# Supplementary material for: Numerical study on the influence of salt marsh plants on coastal wetland hydrodynamics and suspended sediment transport
Source: Frontiers journal article supplement (doi:10.3389/fenvs.2023.1180457), 2023-05-19
Supplement: Table_2.XLSX [file Table_2.XLSX]

## Sheet: bayuquan
2019-04-01	1.08	1.1218
2019-04-01 01:00:00	1.18	1.34207
2019-04-01 02:00:00	1.08	1.31249
2019-04-01 03:00:00	0.78	0.996322
2019-04-01 04:00:00	0.34	0.595109
2019-04-01 05:00:00	-0.14	0.192753
2019-04-01 06:00:00	-0.6	-0.199111
2019-04-01 07:00:00	-0.93	-0.551121
2019-04-01 08:00:00	-1.06	-0.82484
2019-04-01 09:00:00	-0.96	-0.954938
2019-04-01 10:00:00	-0.65	-0.663837
2019-04-01 11:00:00	-0.21	-0.210578
2019-04-01 12:00:00	0.22	0.20229
2019-04-01 13:00:00	0.51	0.584166
2019-04-01 14:00:00	0.55	0.724994
2019-04-01 15:00:00	0.37	0.50965
2019-04-01 16:00:00	0.02	0.0704149
2019-04-01 17:00:00	-0.4	-0.347529
2019-04-01 18:00:00	-0.78	-0.686005
2019-04-01 19:00:00	-1	-0.974685
2019-04-01 20:00:00	-0.98	-1.18296
2019-04-01 21:00:00	-0.7	-1.07649
2019-04-01 22:00:00	-0.22	-0.393671
2019-04-01 23:00:00	0.32	0.160146
2019-04-02	0.82	0.748707
2019-04-02 01:00:00	1.15	1.20377
2019-04-02 02:00:00	1.25	1.42229
2019-04-02 03:00:00	1.1	1.33966
2019-04-02 04:00:00	0.74	0.929587
2019-04-02 05:00:00	0.23	0.479292
2019-04-02 06:00:00	-0.32	0.0586035
2019-04-02 07:00:00	-0.8	-0.344584
2019-04-02 08:00:00	-1.11	-0.700113
2019-04-02 09:00:00	-1.18	-0.965982
2019-04-02 10:00:00	-0.98	-1.0419
2019-04-02 11:00:00	-0.54	-0.506332
2019-04-02 12:00:00	0.02	0.00531993
2019-04-02 13:00:00	0.51	0.489121
2019-04-02 14:00:00	0.79	0.882139
2019-04-02 15:00:00	0.77	0.953057
2019-04-02 16:00:00	0.5	0.60672
2019-04-02 17:00:00	0.05	0.115991
2019-04-02 18:00:00	-0.46	-0.31736
2019-04-02 19:00:00	-0.91	-0.675026
2019-04-02 20:00:00	-1.15	-0.991642
2019-04-02 21:00:00	-1.1	-1.22145
2019-04-02 22:00:00	-0.74	-1.03855
2019-04-02 23:00:00	-0.18	-0.28173
2019-04-03	0.44	0.290117
2019-04-03 01:00:00	0.96	0.916412
2019-04-03 02:00:00	1.25	1.34704
2019-04-03 03:00:00	1.28	1.49389
2019-04-03 04:00:00	1.03	1.24551
2019-04-03 05:00:00	0.57	0.750721
2019-04-03 06:00:00	-0.01	0.27679
2019-04-03 07:00:00	-0.59	-0.146822
2019-04-03 08:00:00	-1.05	-0.549204
2019-04-03 09:00:00	-1.27	-0.889714
2019-04-03 10:00:00	-1.2	-1.11118
2019-04-03 11:00:00	-0.84	-0.895605
2019-04-03 12:00:00	-0.25	-0.191495
2019-04-03 13:00:00	0.37	0.31711
2019-04-03 14:00:00	0.85	0.876175
2019-04-03 15:00:00	1.03	1.15972
2019-04-03 16:00:00	0.88	1.05799
2019-04-03 17:00:00	0.48	0.557228
2019-04-03 18:00:00	-0.07	0.0503379
2019-04-03 19:00:00	-0.65	-0.37166
2019-04-03 20:00:00	-1.1	-0.742843
2019-04-03 21:00:00	-1.28	-1.06723
2019-04-03 22:00:00	-1.13	-1.26926
2019-04-03 23:00:00	-0.65	-0.795096
2019-04-04	0	-0.0604387
2019-04-04 01:00:00	0.66	0.522493
2019-04-04 02:00:00	1.13	1.16178
2019-04-04 03:00:00	1.33	1.49178
2019-04-04 04:00:00	1.22	1.48313
2019-04-04 05:00:00	0.85	1.02572
2019-04-04 06:00:00	0.29	0.499046
2019-04-04 07:00:00	-0.33	0.036329
2019-04-04 08:00:00	-0.89	-0.387612
2019-04-04 09:00:00	-1.25	-0.774479
2019-04-04 10:00:00	-1.32	-1.07968
2019-04-04 11:00:00	-1.07	-1.18722
2019-04-04 12:00:00	-0.52	-0.464176
2019-04-04 13:00:00	0.15	0.154458
2019-04-04 14:00:00	0.77	0.7385
2019-04-04 15:00:00	1.13	1.23138
2019-04-04 16:00:00	1.14	1.34262
2019-04-04 17:00:00	0.84	0.971409
2019-04-04 18:00:00	0.31	0.422813
2019-04-04 19:00:00	-0.31	-0.0646618
2019-04-04 20:00:00	-0.89	-0.47348
2019-04-04 21:00:00	-1.27	-0.852444
2019-04-04 22:00:00	-1.34	-1.16295
2019-04-04 23:00:00	-1.04	-1.26407
2019-04-05	-0.44	-0.455535
2019-04-05 01:00:00	0.27	0.206476
2019-04-05 02:00:00	0.9	0.843616
2019-04-05 03:00:00	1.27	1.3933
2019-04-05 04:00:00	1.31	1.57342
2019-04-05 05:00:00	1.05	1.29643
2019-04-05 06:00:00	0.56	0.735542
2019-04-05 07:00:00	-0.06	0.219812
2019-04-05 08:00:00	-0.68	-0.221313
2019-04-05 09:00:00	-1.16	-0.637937
2019-04-05 10:00:00	-1.36	-0.997137
2019-04-05 11:00:00	-1.23	-1.23377
2019-04-05 12:00:00	-0.76	-0.847101
2019-04-05 13:00:00	-0.08	-0.0488894
2019-04-05 14:00:00	0.61	0.525289
2019-04-05 15:00:00	1.12	1.17926
2019-04-05 16:00:00	1.3	1.48029
2019-04-05 17:00:00	1.12	1.35976
2019-04-05 18:00:00	0.67	0.809167
2019-04-05 19:00:00	0.05	0.263426
2019-04-05 20:00:00	-0.6	-0.190129
2019-04-05 21:00:00	-1.12	-0.604531
2019-04-05 22:00:00	-1.38	-0.974088
2019-04-05 23:00:00	-1.29	-1.24053
2019-04-06	-0.84	-0.978884
2019-04-06 01:00:00	-0.15	-0.109951
2019-04-06 02:00:00	0.56	0.488113
2019-04-06 03:00:00	1.1	1.17397
2019-04-06 04:00:00	1.31	1.54513
2019-04-06 05:00:00	1.18	1.51532
2019-04-06 06:00:00	0.78	0.989137
2019-04-06 07:00:00	0.2	0.425055
2019-04-06 08:00:00	-0.44	-0.053773
2019-04-06 09:00:00	-1.01	-0.48498
2019-04-06 10:00:00	-1.35	-0.879517
2019-04-06 11:00:00	-1.35	-1.19285
2019-04-06 12:00:00	-0.99	-1.26164
2019-04-06 13:00:00	-0.34	-0.34494
2019-04-06 14:00:00	0.41	0.306743
2019-04-06 15:00:00	1.04	0.98365
2019-04-06 16:00:00	1.37	1.49808
2019-04-06 17:00:00	1.34	1.61165
2019-04-06 18:00:00	0.99	1.20139
2019-04-06 19:00:00	0.42	0.62252
2019-04-06 20:00:00	-0.25	0.110435
2019-04-06 21:00:00	-0.87	-0.327874
2019-04-06 22:00:00	-1.28	-0.738491
2019-04-06 23:00:00	-1.39	-1.08375
2019-04-07	-1.14	-1.26344
2019-04-07 01:00:00	-0.56	-0.528732
2019-04-07 02:00:00	0.17	0.18791
2019-04-07 03:00:00	0.82	0.810929
2019-04-07 04:00:00	1.22	1.4133
2019-04-07 05:00:00	1.25	1.58694
2019-04-07 06:00:00	0.95	1.24977
2019-04-07 07:00:00	0.43	0.657465
2019-04-07 08:00:00	-0.2	0.124835
2019-04-07 09:00:00	-0.82	-0.319569
2019-04-07 10:00:00	-1.28	-0.737395
2019-04-07 11:00:00	-1.43	-1.10003
2019-04-07 12:00:00	-1.22	-1.33543
2019-04-07 13:00:00	-0.63	-0.803598
2019-04-07 14:00:00	0.14	0.0383954
2019-04-07 15:00:00	0.88	0.663038
2019-04-07 16:00:00	1.37	1.37405
2019-04-07 17:00:00	1.51	1.68754
2019-04-07 18:00:00	1.29	1.58042
2019-04-07 19:00:00	0.79	1.01028
2019-04-07 20:00:00	0.14	0.448721
2019-04-07 21:00:00	-0.53	-0.0258648
2019-04-07 22:00:00	-1.08	-0.465848
2019-04-07 23:00:00	-1.36	-0.860373
2019-04-08	-1.31	-1.15966
2019-04-08 01:00:00	-0.91	-1.10976
2019-04-08 02:00:00	-0.25	-0.164157
2019-04-08 03:00:00	0.45	0.439768
2019-04-08 04:00:00	1	1.11863
2019-04-08 05:00:00	1.23	1.51678
2019-04-08 06:00:00	1.09	1.47378
2019-04-08 07:00:00	0.66	0.912832
2019-04-08 08:00:00	0.05	0.335575
2019-04-08 09:00:00	-0.59	-0.147778
2019-04-08 10:00:00	-1.15	-0.575573
2019-04-08 11:00:00	-1.46	-0.967796
2019-04-08 12:00:00	-1.41	-1.28227
2019-04-08 13:00:00	-0.97	-1.32736
2019-04-08 14:00:00	-0.21	-0.344708
2019-04-08 15:00:00	0.62	0.332134
2019-04-08 16:00:00	1.28	1.05475
2019-04-08 17:00:00	1.6	1.60463
2019-04-08 18:00:00	1.54	1.76556
2019-04-08 19:00:00	1.17	1.41257
2019-04-08 20:00:00	0.58	0.826432
2019-04-08 21:00:00	-0.12	0.298453
2019-04-08 22:00:00	-0.76	-0.157824
2019-04-08 23:00:00	-1.2	-0.587504
2019-04-09	-1.34	-0.955483
2019-04-09 01:00:00	-1.15	-1.1863
2019-04-09 02:00:00	-0.65	-0.685197
2019-04-09 03:00:00	0.02	0.0933233
2019-04-09 04:00:00	0.66	0.667884
2019-04-09 05:00:00	1.08	1.29526
2019-04-09 06:00:00	1.15	1.49651
2019-04-09 07:00:00	0.86	1.17599
2019-04-09 08:00:00	0.33	0.581842
2019-04-09 09:00:00	-0.31	0.0414785
2019-04-09 10:00:00	-0.93	-0.399411
2019-04-09 11:00:00	-1.39	-0.809089
2019-04-09 12:00:00	-1.53	-1.16851
2019-04-09 13:00:00	-1.28	-1.4104
2019-04-09 14:00:00	-0.64	-0.919851
2019-04-09 15:00:00	0.21	-0.0517164
2019-04-09 16:00:00	1.02	0.587804
2019-04-09 17:00:00	1.57	1.33127
2019-04-09 18:00:00	1.72	1.71285
2019-04-09 19:00:00	1.51	1.72465
2019-04-09 20:00:00	1.03	1.2303
2019-04-09 21:00:00	0.37	0.67074
2019-04-09 22:00:00	-0.33	0.1778
2019-04-09 23:00:00	-0.91	-0.272116
2019-04-10	-1.24	-0.682129
2019-04-10 01:00:00	-1.26	-1.0105
2019-04-10 02:00:00	-0.97	-1.13994
2019-04-10 03:00:00	-0.42	-0.368492
2019-04-10 04:00:00	0.22	0.259113
2019-04-10 05:00:00	0.76	0.854354
2019-04-10 06:00:00	1.05	1.32571
2019-04-10 07:00:00	0.98	1.35346
2019-04-10 08:00:00	0.59	0.850642
2019-04-10 09:00:00	0.01	0.275641
2019-04-10 10:00:00	-0.63	-0.21349
2019-04-10 11:00:00	-1.18	-0.627603
2019-04-10 12:00:00	-1.51	-1.00913
2019-04-10 13:00:00	-1.48	-1.32455
2019-04-10 14:00:00	-1.07	-1.44331
2019-04-10 15:00:00	-0.3	-0.577416
2019-04-10 16:00:00	0.57	0.131664
2019-04-10 17:00:00	1.32	0.818143
2019-04-10 18:00:00	1.73	1.4553
2019-04-10 19:00:00	1.75	1.72864
2019-04-10 20:00:00	1.44	1.61554
2019-04-10 21:00:00	0.89	1.08194
2019-04-10 22:00:00	0.21	0.556519
2019-04-10 23:00:00	-0.45	0.0893836
2019-04-11	-0.96	-0.348355
2019-04-11 01:00:00	-1.19	-0.733671
2019-04-11 02:00:00	-1.13	-1.01637
2019-04-11 03:00:00	-0.8	-1.00556
2019-04-11 04:00:00	-0.26	-0.201675
2019-04-11 05:00:00	0.3	0.334989
2019-04-11 06:00:00	0.74	0.914547
2019-04-11 07:00:00	0.92	1.23968
2019-04-11 08:00:00	0.76	1.11631
2019-04-11 09:00:00	0.32	0.562312
2019-04-11 10:00:00	-0.26	0.0205627
2019-04-11 11:00:00	-0.84	-0.424538
2019-04-11 12:00:00	-1.3	-0.813765
2019-04-11 13:00:00	-1.5	-1.16193
2019-04-11 14:00:00	-1.35	-1.42369
2019-04-11 15:00:00	-0.82	-1.28292
2019-04-11 16:00:00	-0.03	-0.403081
2019-04-11 17:00:00	0.81	0.230885
2019-04-11 18:00:00	1.47	0.938528
2019-04-11 19:00:00	1.77	1.46189
2019-04-11 20:00:00	1.72	1.67632
2019-04-11 21:00:00	1.37	1.49986
2019-04-11 22:00:00	0.8	0.995721
2019-04-11 23:00:00	0.15	0.502078
2019-04-12	-0.46	0.0553864
2019-04-12 01:00:00	-0.89	-0.365694
2019-04-12 02:00:00	-1.07	-0.726761
2019-04-12 03:00:00	-1	-0.973469
2019-04-12 04:00:00	-0.68	-0.881841
2019-04-12 05:00:00	-0.22	-0.179707
2019-04-12 06:00:00	0.26	0.303425
2019-04-12 07:00:00	0.61	0.822661
2019-04-12 08:00:00	0.71	1.07006
2019-04-12 09:00:00	0.53	0.876972
2019-04-12 10:00:00	0.12	0.346083
2019-04-12 11:00:00	-0.4	-0.16002
2019-04-12 12:00:00	-0.91	-0.572714
2019-04-12 13:00:00	-1.27	-0.933526
2019-04-12 14:00:00	-1.38	-1.24736
2019-04-12 15:00:00	-1.17	-1.45729
2019-04-12 16:00:00	-0.63	-1.12183
2019-04-12 17:00:00	0.11	-0.360381
2019-04-12 18:00:00	0.88	0.240074
2019-04-12 19:00:00	1.45	0.923227
2019-04-12 20:00:00	1.72	1.39049
2019-04-12 21:00:00	1.65	1.59086
2019-04-12 22:00:00	1.32	1.44512
2019-04-12 23:00:00	0.8	0.995189
2019-04-13	0.2	0.532599
2019-04-13 01:00:00	-0.35	0.101617
2019-04-13 02:00:00	-0.75	-0.307352
2019-04-13 03:00:00	-0.93	-0.656678
2019-04-13 04:00:00	-0.9	-0.899769
2019-04-13 05:00:00	-0.66	-0.889496
2019-04-13 06:00:00	-0.29	-0.307785
2019-04-13 07:00:00	0.11	0.144364
2019-04-13 08:00:00	0.41	0.60426
2019-04-13 09:00:00	0.5	0.866387
2019-04-13 10:00:00	0.36	0.745837
2019-04-13 11:00:00	0.03	0.268033
2019-04-13 12:00:00	-0.39	-0.213922
2019-04-13 13:00:00	-0.82	-0.611914
2019-04-13 14:00:00	-1.13	-0.950707
2019-04-13 15:00:00	-1.22	-1.24077
2019-04-13 16:00:00	-1.04	-1.43147
2019-04-13 17:00:00	-0.57	-1.14109
2019-04-13 18:00:00	0.08	-0.435154
2019-04-13 19:00:00	0.77	0.145317
2019-04-13 20:00:00	1.31	0.794885
2019-04-13 21:00:00	1.6	1.27257
2019-04-13 22:00:00	1.59	1.51208
2019-04-13 23:00:00	1.33	1.46157
2019-04-14	0.88	1.08587
2019-04-14 01:00:00	0.35	0.647815
2019-04-14 02:00:00	-0.16	0.220433
2019-04-14 03:00:00	-0.58	-0.189027
2019-04-14 04:00:00	-0.83	-0.550652
2019-04-14 05:00:00	-0.89	-0.827754
2019-04-14 06:00:00	-0.75	-0.941873
2019-04-14 07:00:00	-0.45	-0.554753
2019-04-14 08:00:00	-0.1	-0.0885186
2019-04-14 09:00:00	0.22	0.339305
2019-04-14 10:00:00	0.38	0.700326
2019-04-14 11:00:00	0.34	0.762608
2019-04-14 12:00:00	0.12	0.417795
2019-04-14 13:00:00	-0.23	-0.0549425
2019-04-14 14:00:00	-0.62	-0.477694
2019-04-14 15:00:00	-0.94	-0.822832
2019-04-14 16:00:00	-1.09	-1.1216
2019-04-14 17:00:00	-1	-1.3503
2019-04-14 18:00:00	-0.66	-1.33044
2019-04-14 19:00:00	-0.1	-0.628124
2019-04-14 20:00:00	0.54	-0.0290884
2019-04-14 21:00:00	1.11	0.588339
2019-04-14 22:00:00	1.46	1.14248
2019-04-14 23:00:00	1.56	1.45708
2019-04-15	1.39	1.51529
2019-04-15 01:00:00	1.03	1.22013
2019-04-15 02:00:00	0.54	0.780347
2019-04-15 03:00:00	0.01	0.336934
2019-04-15 04:00:00	-0.46	-0.0842983
2019-04-15 05:00:00	-0.81	-0.475228
2019-04-15 06:00:00	-0.97	-0.797412
2019-04-15 07:00:00	-0.91	-0.997429
2019-04-15 08:00:00	-0.65	-0.827461
2019-04-15 09:00:00	-0.26	-0.252627
2019-04-15 10:00:00	0.14	0.204807
2019-04-15 11:00:00	0.41	0.679135
2019-04-15 12:00:00	0.49	0.912032
2019-04-15 13:00:00	0.35	0.764845
2019-04-15 14:00:00	0.03	0.285233
2019-04-15 15:00:00	-0.39	-0.189996
2019-04-15 16:00:00	-0.78	-0.579915
2019-04-15 17:00:00	-1.05	-0.921548
2019-04-15 18:00:00	-1.09	-1.2136
2019-04-15 19:00:00	-0.86	-1.38359
2019-04-15 20:00:00	-0.36	-0.907907
2019-04-15 21:00:00	0.28	-0.202931
2019-04-15 22:00:00	0.91	0.386486
2019-04-15 23:00:00	1.37	1.04164
2019-04-16	1.57	1.44585
2019-04-16 01:00:00	1.49	1.58395
2019-04-16 02:00:00	1.16	1.33096
2019-04-16 03:00:00	0.66	0.846931
2019-04-16 04:00:00	0.09	0.370335
2019-04-16 05:00:00	-0.47	-0.0664749
2019-04-16 06:00:00	-0.9	-0.480815
2019-04-16 07:00:00	-1.13	-0.834537
2019-04-16 08:00:00	-1.09	-1.07799
2019-04-16 09:00:00	-0.79	-0.983453
2019-04-16 10:00:00	-0.31	-0.252845
2019-04-16 11:00:00	0.21	0.266092
2019-04-16 12:00:00	0.61	0.831851
2019-04-16 13:00:00	0.77	1.1574
2019-04-16 14:00:00	0.66	1.09257
2019-04-16 15:00:00	0.3	0.594043
2019-04-16 16:00:00	-0.19	0.07181
2019-04-16 17:00:00	-0.69	-0.364532
2019-04-16 18:00:00	-1.09	-0.746307
2019-04-16 19:00:00	-1.25	-1.08976
2019-04-16 20:00:00	-1.09	-1.34369
2019-04-16 21:00:00	-0.62	-1.146
2019-04-16 22:00:00	0.08	-0.292228
2019-04-16 23:00:00	0.79	0.324991
2019-04-17	1.34	1.02114
2019-04-17 01:00:00	1.6	1.49801
2019-04-17 02:00:00	1.55	1.65654
2019-04-17 03:00:00	1.21	1.36176
2019-04-17 04:00:00	0.66	0.819338
2019-04-17 05:00:00	0.02	0.312588
2019-04-17 06:00:00	-0.61	-0.136137
2019-04-17 07:00:00	-1.09	-0.561211
2019-04-17 08:00:00	-1.32	-0.927789
2019-04-17 09:00:00	-1.22	-1.17912
2019-04-17 10:00:00	-0.82	-0.931244
2019-04-17 11:00:00	-0.19	-0.108746
2019-04-17 12:00:00	0.45	0.455594
2019-04-17 13:00:00	0.93	1.10195
2019-04-17 14:00:00	1.11	1.42726
2019-04-17 15:00:00	0.94	1.32503
2019-04-17 16:00:00	0.5	0.772419
2019-04-17 17:00:00	-0.09	0.221488
2019-04-17 18:00:00	-0.7	-0.2366
2019-04-17 19:00:00	-1.19	-0.649243
2019-04-17 20:00:00	-1.42	-1.02327
2019-04-17 21:00:00	-1.28	-1.30935
2019-04-17 22:00:00	-0.77	-1.19896
2019-04-17 23:00:00	-0.01	-0.249577
2019-04-18	0.77	0.390365
2019-04-18 01:00:00	1.36	1.11248
2019-04-18 02:00:00	1.62	1.5944
2019-04-18 03:00:00	1.52	1.70336
2019-04-18 04:00:00	1.12	1.28397
2019-04-18 05:00:00	0.51	0.704738
2019-04-18 06:00:00	-0.19	0.187827
2019-04-18 07:00:00	-0.84	-0.264397
2019-04-18 08:00:00	-1.31	-0.689894
2019-04-18 09:00:00	-1.46	-1.05265
2019-04-18 10:00:00	-1.25	-1.27906
2019-04-18 11:00:00	-0.68	-0.700299
2019-04-18 12:00:00	0.08	0.110583
2019-04-18 13:00:00	0.8	0.730235
2019-04-18 14:00:00	1.29	1.41095
2019-04-18 15:00:00	1.39	1.66651
2019-04-18 16:00:00	1.13	1.43832
2019-04-18 17:00:00	0.59	0.83475
2019-04-18 18:00:00	-0.1	0.276164
2019-04-18 19:00:00	-0.78	-0.186953
2019-04-18 20:00:00	-1.31	-0.620566
2019-04-18 21:00:00	-1.53	-1.00776
2019-04-18 22:00:00	-1.35	-1.29431
2019-04-18 23:00:00	-0.78	-1.05687
2019-04-19	0.03	-0.100837
2019-04-19 01:00:00	0.83	0.533105
2019-04-19 02:00:00	1.39	1.27687
2019-04-19 03:00:00	1.57	1.68924
2019-04-19 04:00:00	1.38	1.67249
2019-04-19 05:00:00	0.9	1.11434
2019-04-19 06:00:00	0.23	0.522608
2019-04-19 07:00:00	-0.48	0.0213108
2019-04-19 08:00:00	-1.11	-0.430477
2019-04-19 09:00:00	-1.5	-0.846916
2019-04-19 10:00:00	-1.51	-1.18921
2019-04-19 11:00:00	-1.13	-1.33201
2019-04-19 12:00:00	-0.4	-0.365135
2019-04-19 13:00:00	0.45	0.351793
2019-04-19 14:00:00	1.18	1.07228
2019-04-19 15:00:00	1.58	1.66966
2019-04-19 16:00:00	1.56	1.83114
2019-04-19 17:00:00	1.18	1.43044
2019-04-19 18:00:00	0.55	0.812115
2019-04-19 19:00:00	-0.2	0.264969
2019-04-19 20:00:00	-0.9	-0.200585
2019-04-19 21:00:00	-1.41	-0.640819
2019-04-19 22:00:00	-1.56	-1.02577
2019-04-19 23:00:00	-1.31	-1.28759
2019-04-20	-0.67	-0.799806
2019-04-20 01:00:00	0.16	0.0936385
2019-04-20 02:00:00	0.92	0.721245
2019-04-20 03:00:00	1.39	1.44769
2019-04-20 04:00:00	1.46	1.73374
2019-04-20 05:00:00	1.16	1.50662
2019-04-20 06:00:00	0.6	0.877811
2019-04-20 07:00:00	-0.1	0.29867
2019-04-20 08:00:00	-0.8	-0.176686
2019-04-20 09:00:00	-1.36	-0.619872
2019-04-20 10:00:00	-1.6	-1.01881
2019-04-20 11:00:00	-1.45	-1.32202
2019-04-20 12:00:00	-0.87	-1.08787
2019-04-20 13:00:00	-0.01	-0.0688339
2019-04-20 14:00:00	0.86	0.598714
2019-04-20 15:00:00	1.51	1.39339
2019-04-20 16:00:00	1.77	1.85058
2019-04-20 17:00:00	1.61	1.88219
2019-04-20 18:00:00	1.13	1.33849
2019-04-20 19:00:00	0.42	0.730739
2019-04-20 20:00:00	-0.35	0.207897
2019-04-20 21:00:00	-1.03	-0.261904
2019-04-20 22:00:00	-1.46	-0.697627
2019-04-20 23:00:00	-1.52	-1.06252
2019-04-21	-1.19	-1.26704
2019-04-21 01:00:00	-0.49	-0.461575
2019-04-21 02:00:00	0.31	0.282302
2019-04-21 03:00:00	1	0.940467
2019-04-21 04:00:00	1.34	1.55546
2019-04-21 05:00:00	1.28	1.68255
2019-04-21 06:00:00	0.88	1.21904
2019-04-21 07:00:00	0.26	0.596528
2019-04-21 08:00:00	-0.44	0.0541835
2019-04-21 09:00:00	-1.09	-0.397479
2019-04-21 10:00:00	-1.53	-0.821778
2019-04-21 11:00:00	-1.6	-1.19172
2019-04-21 12:00:00	-1.25	-1.42713
2019-04-21 13:00:00	-0.51	-0.704303
2019-04-21 14:00:00	0.41	0.16878
2019-04-21 15:00:00	1.23	0.866267
2019-04-21 16:00:00	1.75	1.62772
2019-04-21 17:00:00	1.85	1.94288
2019-04-21 18:00:00	1.57	1.81081
2019-04-21 19:00:00	0.99	1.18855
2019-04-21 20:00:00	0.24	0.609133
2019-04-21 21:00:00	-0.52	0.110407
2019-04-21 22:00:00	-1.13	-0.354046
2019-04-21 23:00:00	-1.46	-0.775282
2019-04-22	-1.43	-1.1016
2019-04-22 01:00:00	-1.01	-1.16722
2019-04-22 02:00:00	-0.3	-0.180304
2019-04-22 03:00:00	0.45	0.446707
2019-04-22 04:00:00	1.03	1.13503
2019-04-22 05:00:00	1.24	1.56349
2019-04-22 06:00:00	1.05	1.49811
2019-04-22 07:00:00	0.58	0.893988
2019-04-22 08:00:00	-0.07	0.297709
2019-04-22 09:00:00	-0.75	-0.19438
2019-04-22 10:00:00	-1.32	-0.627321
2019-04-22 11:00:00	-1.61	-1.02511
2019-04-22 12:00:00	-1.49	-1.34895
2019-04-22 13:00:00	-0.96	-1.39769
2019-04-22 14:00:00	-0.1	-0.345794
2019-04-22 15:00:00	0.8	0.369028
2019-04-22 16:00:00	1.52	1.13988
2019-04-22 17:00:00	1.88	1.73474
2019-04-22 18:00:00	1.84	1.9356
2019-04-22 19:00:00	1.46	1.6187
2019-04-22 20:00:00	0.82	1.01263
2019-04-22 21:00:00	0.06	0.464695
2019-04-22 22:00:00	-0.66	-0.0128717
2019-04-22 23:00:00	-1.19	-0.462625
2019-04-23	-1.41	-0.854489
2019-04-23 01:00:00	-1.29	-1.12389
2019-04-23 02:00:00	-0.82	-0.833861
2019-04-23 03:00:00	-0.14	0.0200741
2019-04-23 04:00:00	0.54	0.57998
2019-04-23 05:00:00	1	1.22456
2019-04-23 06:00:00	1.08	1.46456
2019-04-23 07:00:00	0.81	1.16049
2019-04-23 08:00:00	0.28	0.554899
2019-04-23 09:00:00	-0.37	0.00130443
2019-04-23 10:00:00	-1.01	-0.443724
2019-04-23 11:00:00	-1.46	-0.851709
2019-04-23 12:00:00	-1.58	-1.21306
2019-04-23 13:00:00	-1.29	-1.46648
2019-04-23 14:00:00	-0.61	-1.00733
2019-04-23 15:00:00	0.28	-0.109338
2019-04-23 16:00:00	1.12	0.54846
2019-04-23 17:00:00	1.7	1.31988
2019-04-23 18:00:00	1.91	1.75009
2019-04-23 19:00:00	1.77	1.82603
2019-04-23 20:00:00	1.31	1.38892
2019-04-23 21:00:00	0.65	0.827975
2019-04-23 22:00:00	-0.1	0.319128
2019-04-23 23:00:00	-0.75	-0.14058
2019-04-24	-1.18	-0.563681
2019-04-24 01:00:00	-1.31	-0.912237
2019-04-24 02:00:00	-1.13	-1.09959
2019-04-24 03:00:00	-0.64	-0.515894
2019-04-24 04:00:00	-0.02	0.141086
2019-04-24 05:00:00	0.57	0.681823
2019-04-24 06:00:00	0.91	1.193
2019-04-24 07:00:00	0.89	1.25815
2019-04-24 08:00:00	0.55	0.7916
2019-04-24 09:00:00	0	0.220877
2019-04-24 10:00:00	-0.62	-0.273408
2019-04-24 11:00:00	-1.17	-0.68051
2019-04-24 12:00:00	-1.49	-1.05173
2019-04-24 13:00:00	-1.46	-1.36123
2019-04-24 14:00:00	-1.03	-1.48268
2019-04-24 15:00:00	-0.28	-0.652487
2019-04-24 16:00:00	0.57	0.0572079
2019-04-24 17:00:00	1.31	0.733284
2019-04-24 18:00:00	1.75	1.38592
2019-04-24 19:00:00	1.86	1.69089
2019-04-24 20:00:00	1.64	1.65331
2019-04-24 21:00:00	1.15	1.17517
2019-04-24 22:00:00	0.49	0.662231
2019-04-24 23:00:00	-0.2	0.193514
2019-04-25	-0.77	-0.243178
2019-04-25 01:00:00	-1.1	-0.630376
2019-04-25 02:00:00	-1.17	-0.924413
2019-04-25 03:00:00	-0.95	-1.00194
2019-04-25 04:00:00	-0.5	-0.343575
2019-04-25 05:00:00	0.04	0.182186
2019-04-25 06:00:00	0.52	0.691712
2019-04-25 07:00:00	0.76	1.03746
2019-04-25 08:00:00	0.67	0.960604
2019-04-25 09:00:00	0.31	0.447587
2019-04-25 10:00:00	-0.21	-0.0770796
2019-04-25 11:00:00	-0.76	-0.511689
2019-04-25 12:00:00	-1.21	-0.880317
2019-04-25 13:00:00	-1.4	-1.20295
2019-04-25 14:00:00	-1.25	-1.43612
2019-04-25 15:00:00	-0.75	-1.2169
2019-04-25 16:00:00	-0.02	-0.41993
2019-04-25 17:00:00	0.75	0.185898
2019-04-25 18:00:00	1.35	0.863821
2019-04-25 19:00:00	1.68	1.35853
2019-04-25 20:00:00	1.72	1.57682
2019-04-25 21:00:00	1.47	1.45531
2019-04-25 22:00:00	0.99	1.00856
2019-04-25 23:00:00	0.37	0.546066
2019-04-26	-0.23	0.11613
2019-04-26 01:00:00	-0.71	-0.291043
2019-04-26 02:00:00	-0.97	-0.638181
2019-04-26 03:00:00	-1.01	-0.878784
2019-04-26 04:00:00	-0.81	-0.867776
2019-04-26 05:00:00	-0.43	-0.310474
2019-04-26 06:00:00	0.03	0.12212
2019-04-26 07:00:00	0.41	0.556261
2019-04-26 08:00:00	0.58	0.787745
2019-04-26 09:00:00	0.47	0.631274
2019-04-26 10:00:00	0.14	0.15754
2019-04-26 11:00:00	-0.3	-0.308381
2019-04-26 12:00:00	-0.76	-0.69064
2019-04-26 13:00:00	-1.11	-1.00996
2019-04-26 14:00:00	-1.21	-1.26954
2019-04-26 15:00:00	-1.01	-1.39275
2019-04-26 16:00:00	-0.52	-0.900991
2019-04-26 17:00:00	0.13	-0.270959
2019-04-26 18:00:00	0.78	0.293346
2019-04-26 19:00:00	1.26	0.897643
2019-04-26 20:00:00	1.52	1.2807
2019-04-26 21:00:00	1.53	1.43789
2019-04-26 22:00:00	1.29	1.29838
2019-04-26 23:00:00	0.85	0.918759
2019-04-27	0.32	0.506748
2019-04-27 01:00:00	-0.2	0.112314
2019-04-27 02:00:00	-0.6	-0.265971
2019-04-27 03:00:00	-0.84	-0.582487
2019-04-27 04:00:00	-0.89	-0.796832
2019-04-27 05:00:00	-0.73	-0.804571
2019-04-27 06:00:00	-0.43	-0.423903
2019-04-27 07:00:00	-0.05	-0.0653583
2019-04-27 08:00:00	0.27	0.282268
2019-04-27 09:00:00	0.42	0.480163
2019-04-27 10:00:00	0.35	0.375531
2019-04-27 11:00:00	0.1	-0.00927945
2019-04-27 12:00:00	-0.26	-0.412219
2019-04-27 13:00:00	-0.63	-0.750706
2019-04-27 14:00:00	-0.9	-1.01619
2019-04-27 15:00:00	-0.97	-1.20772
2019-04-27 16:00:00	-0.78	-1.2185
2019-04-27 17:00:00	-0.38	-0.716594
2019-04-27 18:00:00	0.15	-0.180644
2019-04-27 19:00:00	0.68	0.351584
2019-04-27 20:00:00	1.08	0.856086
2019-04-27 21:00:00	1.32	1.18656
2019-04-27 22:00:00	1.33	1.32617
2019-04-27 23:00:00	1.14	1.22458
2019-04-28	0.77	0.915807
2019-04-28 01:00:00	0.32	0.544933
2019-04-28 02:00:00	-0.13	0.172933
2019-04-28 03:00:00	-0.51	-0.19172
2019-04-28 04:00:00	-0.76	-0.50484
2019-04-28 05:00:00	-0.84	-0.734437
2019-04-28 06:00:00	-0.74	-0.821288
2019-04-28 07:00:00	-0.49	-0.62372
2019-04-28 08:00:00	-0.16	-0.326287
2019-04-28 09:00:00	0.16	-0.0136391
2019-04-28 10:00:00	0.34	0.232878
2019-04-28 11:00:00	0.35	0.291129
2019-04-28 12:00:00	0.19	0.0768056
2019-04-28 13:00:00	-0.09	-0.263325
2019-04-28 14:00:00	-0.4	-0.589346
2019-04-28 15:00:00	-0.66	-0.838956
2019-04-28 16:00:00	-0.76	-1.01541
2019-04-28 17:00:00	-0.66	-1.04754
2019-04-28 18:00:00	-0.37	-0.665149
2019-04-28 19:00:00	0.06	-0.173579
2019-04-28 20:00:00	0.51	0.314542
2019-04-28 21:00:00	0.89	0.779524
2019-04-28 22:00:00	1.13	1.11077
2019-04-28 23:00:00	1.19	1.27669
2019-04-29	1.05	1.22719
2019-04-29 01:00:00	0.75	0.956095
2019-04-29 02:00:00	0.35	0.59884
2019-04-29 03:00:00	-0.09	0.22575
2019-04-29 04:00:00	-0.48	-0.147428
2019-04-29 05:00:00	-0.76	-0.480556
2019-04-29 06:00:00	-0.89	-0.743702
2019-04-29 07:00:00	-0.82	-0.891419
2019-04-29 08:00:00	-0.58	-0.805688
2019-04-29 09:00:00	-0.23	-0.475115
2019-04-29 10:00:00	0.14	-0.122058
2019-04-29 11:00:00	0.4	0.218463
2019-04-29 12:00:00	0.49	0.422202
2019-04-29 13:00:00	0.39	0.398367
2019-04-29 14:00:00	0.14	0.106424
2019-04-29 15:00:00	-0.17	-0.250288
2019-04-29 16:00:00	-0.47	-0.552534
2019-04-29 17:00:00	-0.65	-0.787993
2019-04-29 18:00:00	-0.65	-0.944462
2019-04-29 19:00:00	-0.46	-0.831545
2019-04-29 20:00:00	-0.09	-0.306948
2019-04-29 21:00:00	0.34	0.180698
2019-04-29 22:00:00	0.74	0.679468
2019-04-29 23:00:00	1.03	1.0636
2019-04-30	1.14	1.27679
2019-04-30 01:00:00	1.04	1.26054
2019-04-30 02:00:00	0.76	0.964994
2019-04-30 03:00:00	0.35	0.576317
2019-04-30 04:00:00	-0.11	0.185817
2019-04-30 05:00:00	-0.54	-0.199741
2019-04-30 06:00:00	-0.86	-0.552642
2019-04-30 07:00:00	-1	-0.836564
2019-04-30 08:00:00	-0.91	-1.00314
2019-04-30 09:00:00	-0.62	-0.875084
2019-04-30 10:00:00	-0.19	-0.413319
2019-04-30 11:00:00	0.26	0.00901443
2019-04-30 12:00:00	0.59	0.439741
2019-04-30 13:00:00	0.73	0.706223
2019-04-30 14:00:00	0.63	0.710955
2019-04-30 15:00:00	0.35	0.38968
2019-04-30 16:00:00	-0.04	-0.0232332
2019-04-30 17:00:00	-0.42	-0.376672
2019-04-30 18:00:00	-0.69	-0.672526
2019-04-30 19:00:00	-0.76	-0.91301
2019-04-30 20:00:00	-0.6	-0.987163
2019-04-30 21:00:00	-0.24	-0.460901
2019-04-30 22:00:00	0.23	0.0897525
2019-04-30 23:00:00	0.69	0.610343
2019-05-01	1.03	1.07027

## Sheet: jinzhougang
2019-04-01	0.44	0.297681
2019-04-01 01:00:00	0.84	0.797834
2019-04-01 02:00:00	1.08	1.18216
2019-04-01 03:00:00	1.12	1.31581
2019-04-01 04:00:00	0.97	1.11608
2019-04-01 05:00:00	0.64	0.778372
2019-04-01 06:00:00	0.22	0.438862
2019-04-01 07:00:00	-0.22	0.0604674
2019-04-01 08:00:00	-0.59	-0.297511
2019-04-01 09:00:00	-0.85	-0.598537
2019-04-01 10:00:00	-0.95	-0.808589
2019-04-01 11:00:00	-0.84	-0.750635
2019-04-01 12:00:00	-0.55	-0.38213
2019-04-01 13:00:00	-0.16	-0.0760895
2019-04-01 14:00:00	0.19	0.235002
2019-04-01 15:00:00	0.42	0.512116
2019-04-01 16:00:00	0.47	0.539989
2019-04-01 17:00:00	0.31	0.28273
2019-04-01 18:00:00	-0.03	-0.0297395
2019-04-01 19:00:00	-0.43	-0.368587
2019-04-01 20:00:00	-0.77	-0.699541
2019-04-01 21:00:00	-0.91	-0.968199
2019-04-01 22:00:00	-0.83	-1.04169
2019-04-01 23:00:00	-0.53	-0.596225
2019-04-02	-0.07	-0.162918
2019-04-02 01:00:00	0.44	0.311265
2019-04-02 02:00:00	0.87	0.832378
2019-04-02 03:00:00	1.14	1.23964
2019-04-02 04:00:00	1.19	1.34862
2019-04-02 05:00:00	1	1.06883
2019-04-02 06:00:00	0.61	0.707378
2019-04-02 07:00:00	0.11	0.33978
2019-04-02 08:00:00	-0.38	-0.0612672
2019-04-02 09:00:00	-0.78	-0.428177
2019-04-02 10:00:00	-1.04	-0.728907
2019-04-02 11:00:00	-1.09	-0.909683
2019-04-02 12:00:00	-0.91	-0.629827
2019-04-02 13:00:00	-0.52	-0.231583
2019-04-02 14:00:00	-0.03	0.126857
2019-04-02 15:00:00	0.4	0.506893
2019-04-02 16:00:00	0.65	0.788678
2019-04-02 17:00:00	0.65	0.700743
2019-04-02 18:00:00	0.41	0.368
2019-04-02 19:00:00	-0.01	0.0207468
2019-04-02 20:00:00	-0.48	-0.349788
2019-04-02 21:00:00	-0.85	-0.704487
2019-04-02 22:00:00	-1	-0.984168
2019-04-02 23:00:00	-0.89	-1.0267
2019-04-03	-0.53	-0.498289
2019-04-03 01:00:00	-0.01	-0.0483258
2019-04-03 02:00:00	0.55	0.451125
2019-04-03 03:00:00	1	0.979873
2019-04-03 04:00:00	1.25	1.34046
2019-04-03 05:00:00	1.24	1.31292
2019-04-03 06:00:00	0.96	0.93106
2019-04-03 07:00:00	0.48	0.563675
2019-04-03 08:00:00	-0.08	0.159436
2019-04-03 09:00:00	-0.6	-0.250827
2019-04-03 10:00:00	-0.98	-0.607767
2019-04-03 11:00:00	-1.17	-0.884727
2019-04-03 12:00:00	-1.13	-0.903926
2019-04-03 13:00:00	-0.83	-0.381871
2019-04-03 14:00:00	-0.33	0.0119542
2019-04-03 15:00:00	0.22	0.436261
2019-04-03 16:00:00	0.66	0.849048
2019-04-03 17:00:00	0.83	1.00093
2019-04-03 18:00:00	0.72	0.723021
2019-04-03 19:00:00	0.36	0.353755
2019-04-03 20:00:00	-0.14	-0.0236335
2019-04-03 21:00:00	-0.64	-0.420633
2019-04-03 22:00:00	-1	-0.775549
2019-04-03 23:00:00	-1.1	-1.03778
2019-04-04	-0.9	-0.864693
2019-04-04 01:00:00	-0.45	-0.330495
2019-04-04 02:00:00	0.14	0.137901
2019-04-04 03:00:00	0.72	0.675733
2019-04-04 04:00:00	1.14	1.18446
2019-04-04 05:00:00	1.32	1.40815
2019-04-04 06:00:00	1.2	1.15217
2019-04-04 07:00:00	0.81	0.748746
2019-04-04 08:00:00	0.25	0.362686
2019-04-04 09:00:00	-0.34	-0.0686121
2019-04-04 10:00:00	-0.82	-0.46871
2019-04-04 11:00:00	-1.12	-0.80087
2019-04-04 12:00:00	-1.2	-1.01106
2019-04-04 13:00:00	-1.02	-0.618353
2019-04-04 14:00:00	-0.59	-0.131534
2019-04-04 15:00:00	0	0.313952
2019-04-04 16:00:00	0.56	0.799555
2019-04-04 17:00:00	0.9	1.14578
2019-04-04 18:00:00	0.94	1.05761
2019-04-04 19:00:00	0.67	0.657893
2019-04-04 20:00:00	0.2	0.281072
2019-04-04 21:00:00	-0.36	-0.13169
2019-04-04 22:00:00	-0.85	-0.534829
2019-04-04 23:00:00	-1.14	-0.872487
2019-04-05	-1.14	-1.07954
2019-04-05 01:00:00	-0.83	-0.634432
2019-04-05 02:00:00	-0.3	-0.114062
2019-04-05 03:00:00	0.32	0.387326
2019-04-05 04:00:00	0.87	0.940031
2019-04-05 05:00:00	1.22	1.35566
2019-04-05 06:00:00	1.28	1.34398
2019-04-05 07:00:00	1.03	0.92796
2019-04-05 08:00:00	0.53	0.542048
2019-04-05 09:00:00	-0.07	0.11577
2019-04-05 10:00:00	-0.61	-0.314851
2019-04-05 11:00:00	-1	-0.689235
2019-04-05 12:00:00	-1.17	-0.98036
2019-04-05 13:00:00	-1.1	-0.873443
2019-04-05 14:00:00	-0.76	-0.295011
2019-04-05 15:00:00	-0.2	0.163008
2019-04-05 16:00:00	0.42	0.682591
2019-04-05 17:00:00	0.9	1.1625
2019-04-05 18:00:00	1.1	1.31123
2019-04-05 19:00:00	0.97	0.965771
2019-04-05 20:00:00	0.55	0.569049
2019-04-05 21:00:00	-0.03	0.163444
2019-04-05 22:00:00	-0.61	-0.2708
2019-04-05 23:00:00	-1.03	-0.658876
2019-04-06	-1.22	-0.967236
2019-04-06 01:00:00	-1.11	-0.967597
2019-04-06 02:00:00	-0.7	-0.343128
2019-04-06 03:00:00	-0.11	0.135342
2019-04-06 04:00:00	0.5	0.665993
2019-04-06 05:00:00	0.97	1.18898
2019-04-06 06:00:00	1.2	1.41798
2019-04-06 07:00:00	1.12	1.11789
2019-04-06 08:00:00	0.73	0.704647
2019-04-06 09:00:00	0.15	0.300933
2019-04-06 10:00:00	-0.44	-0.146374
2019-04-06 11:00:00	-0.88	-0.556093
2019-04-06 12:00:00	-1.13	-0.895773
2019-04-06 13:00:00	-1.15	-1.08884
2019-04-06 14:00:00	-0.9	-0.534957
2019-04-06 15:00:00	-0.38	-0.0168311
2019-04-06 16:00:00	0.28	0.498754
2019-04-06 17:00:00	0.86	1.05525
2019-04-06 18:00:00	1.21	1.42017
2019-04-06 19:00:00	1.24	1.28868
2019-04-06 20:00:00	0.93	0.85235
2019-04-06 21:00:00	0.37	0.461479
2019-04-06 22:00:00	-0.27	0.0162642
2019-04-06 23:00:00	-0.81	-0.411574
2019-04-07	-1.14	-0.774574
2019-04-07 01:00:00	-1.22	-1.03268
2019-04-07 02:00:00	-1	-0.668378
2019-04-07 03:00:00	-0.51	-0.113838
2019-04-07 04:00:00	0.1	0.379106
2019-04-07 05:00:00	0.65	0.925402
2019-04-07 06:00:00	1.01	1.34292
2019-04-07 07:00:00	1.1	1.30036
2019-04-07 08:00:00	0.86	0.86752
2019-04-07 09:00:00	0.35	0.474973
2019-04-07 10:00:00	-0.27	0.0353222
2019-04-07 11:00:00	-0.79	-0.401701
2019-04-07 12:00:00	-1.11	-0.779318
2019-04-07 13:00:00	-1.22	-1.0714
2019-04-07 14:00:00	-1.07	-0.82739
2019-04-07 15:00:00	-0.61	-0.249181
2019-04-07 16:00:00	0.06	0.257334
2019-04-07 17:00:00	0.74	0.845015
2019-04-07 18:00:00	1.24	1.36714
2019-04-07 19:00:00	1.44	1.52996
2019-04-07 20:00:00	1.3	1.15395
2019-04-07 21:00:00	0.83	0.747239
2019-04-07 22:00:00	0.16	0.323935
2019-04-07 23:00:00	-0.49	-0.130154
2019-04-08	-0.95	-0.537667
2019-04-08 01:00:00	-1.18	-0.870244
2019-04-08 02:00:00	-1.16	-0.997877
2019-04-08 03:00:00	-0.84	-0.359203
2019-04-08 04:00:00	-0.3	0.118013
2019-04-08 05:00:00	0.29	0.618608
2019-04-08 06:00:00	0.75	1.12911
2019-04-08 07:00:00	0.99	1.35695
2019-04-08 08:00:00	0.93	1.04518
2019-04-08 09:00:00	0.55	0.633928
2019-04-08 10:00:00	-0.06	0.223874
2019-04-08 11:00:00	-0.66	-0.226111
2019-04-08 12:00:00	-1.08	-0.636358
2019-04-08 13:00:00	-1.27	-0.977296
2019-04-08 14:00:00	-1.24	-1.16011
2019-04-08 15:00:00	-0.91	-0.545955
2019-04-08 16:00:00	-0.26	-0.0124855
2019-04-08 17:00:00	0.51	0.544335
2019-04-08 18:00:00	1.15	1.14612
2019-04-08 19:00:00	1.52	1.55841
2019-04-08 20:00:00	1.58	1.47594
2019-04-08 21:00:00	1.29	1.02766
2019-04-08 22:00:00	0.68	0.636459
2019-04-08 23:00:00	-0.06	0.18248
2019-04-09	-0.68	-0.260982
2019-04-09 01:00:00	-1.05	-0.641472
2019-04-09 02:00:00	-1.18	-0.93348
2019-04-09 03:00:00	-1.06	-0.727294
2019-04-09 04:00:00	-0.66	-0.163341
2019-04-09 05:00:00	-0.09	0.288683
2019-04-09 06:00:00	0.45	0.798761
2019-04-09 07:00:00	0.8	1.21905
2019-04-09 08:00:00	0.92	1.20718
2019-04-09 09:00:00	0.73	0.790443
2019-04-09 10:00:00	0.23	0.399216
2019-04-09 11:00:00	-0.42	-0.0328066
2019-04-09 12:00:00	-0.96	-0.467427
2019-04-09 13:00:00	-1.27	-0.844491
2019-04-09 14:00:00	-1.35	-1.13968
2019-04-09 15:00:00	-1.18	-0.926297
2019-04-09 16:00:00	-0.66	-0.343191
2019-04-09 17:00:00	0.12	0.180057
2019-04-09 18:00:00	0.91	0.790539
2019-04-09 19:00:00	1.45	1.36019
2019-04-09 20:00:00	1.69	1.62597
2019-04-09 21:00:00	1.62	1.34473
2019-04-09 22:00:00	1.19	0.921589
2019-04-09 23:00:00	0.48	0.514659
2019-04-10	-0.27	0.0584552
2019-04-10 01:00:00	-0.81	-0.36407
2019-04-10 02:00:00	-1.1	-0.715703
2019-04-10 03:00:00	-1.15	-0.944946
2019-04-10 04:00:00	-0.95	-0.527296
2019-04-10 05:00:00	-0.5	-0.0228968
2019-04-10 06:00:00	0.06	0.421608
2019-04-10 07:00:00	0.52	0.894418
2019-04-10 08:00:00	0.78	1.17801
2019-04-10 09:00:00	0.79	0.961651
2019-04-10 10:00:00	0.49	0.558755
2019-04-10 11:00:00	-0.08	0.164223
2019-04-10 12:00:00	-0.69	-0.270561
2019-04-10 13:00:00	-1.13	-0.677642
2019-04-10 14:00:00	-1.34	-1.01928
2019-04-10 15:00:00	-1.32	-1.24104
2019-04-10 16:00:00	-1.01	-0.770336
2019-04-10 17:00:00	-0.35	-0.212778
2019-04-10 18:00:00	0.49	0.338334
2019-04-10 19:00:00	1.21	0.958814
2019-04-10 20:00:00	1.64	1.46289
2019-04-10 21:00:00	1.77	1.59514
2019-04-10 22:00:00	1.58	1.22576
2019-04-10 23:00:00	1.05	0.833142
2019-04-11	0.29	0.414216
2019-04-11 01:00:00	-0.41	-0.0300591
2019-04-11 02:00:00	-0.88	-0.428287
2019-04-11 03:00:00	-1.09	-0.750099
2019-04-11 04:00:00	-1.09	-0.893168
2019-04-11 05:00:00	-0.85	-0.37116
2019-04-11 06:00:00	-0.39	0.0536661
2019-04-11 07:00:00	0.11	0.467717
2019-04-11 08:00:00	0.49	0.884929
2019-04-11 09:00:00	0.67	1.03319
2019-04-11 10:00:00	0.6	0.723543
2019-04-11 11:00:00	0.24	0.347102
2019-04-11 12:00:00	-0.31	-0.0502051
2019-04-11 13:00:00	-0.83	-0.468637
2019-04-11 14:00:00	-1.17	-0.845362
2019-04-11 15:00:00	-1.3	-1.14963
2019-04-11 16:00:00	-1.2	-1.23239
2019-04-11 17:00:00	-0.78	-0.626326
2019-04-11 18:00:00	-0.05	-0.128798
2019-04-11 19:00:00	0.75	0.42691
2019-04-11 20:00:00	1.37	1.02713
2019-04-11 21:00:00	1.7	1.47055
2019-04-11 22:00:00	1.76	1.5255
2019-04-11 23:00:00	1.5	1.14974
2019-04-12	0.93	0.776333
2019-04-12 01:00:00	0.19	0.364256
2019-04-12 02:00:00	-0.44	-0.0626704
2019-04-12 03:00:00	-0.85	-0.439128
2019-04-12 04:00:00	-1.03	-0.735989
2019-04-12 05:00:00	-1.01	-0.829186
2019-04-12 06:00:00	-0.77	-0.344653
2019-04-12 07:00:00	-0.37	0.030719
2019-04-12 08:00:00	0.05	0.403432
2019-04-12 09:00:00	0.36	0.762049
2019-04-12 10:00:00	0.49	0.841067
2019-04-12 11:00:00	0.38	0.534577
2019-04-12 12:00:00	0.04	0.177976
2019-04-12 13:00:00	-0.42	-0.207394
2019-04-12 14:00:00	-0.84	-0.602136
2019-04-12 15:00:00	-1.09	-0.951811
2019-04-12 16:00:00	-1.18	-1.22088
2019-04-12 17:00:00	-1.02	-1.16392
2019-04-12 18:00:00	-0.56	-0.612527
2019-04-12 19:00:00	0.14	-0.131455
2019-04-12 20:00:00	0.85	0.419722
2019-04-12 21:00:00	1.37	0.997796
2019-04-12 22:00:00	1.65	1.41471
2019-04-12 23:00:00	1.69	1.47579
2019-04-13	1.42	1.14058
2019-04-13 01:00:00	0.88	0.780389
2019-04-13 02:00:00	0.22	0.390071
2019-04-13 03:00:00	-0.35	-0.0203503
2019-04-13 04:00:00	-0.73	-0.385784
2019-04-13 05:00:00	-0.92	-0.676443
2019-04-13 06:00:00	-0.93	-0.808515
2019-04-13 07:00:00	-0.76	-0.449315
2019-04-13 08:00:00	-0.44	-0.0962557
2019-04-13 09:00:00	-0.1	0.232653
2019-04-13 10:00:00	0.17	0.552123
2019-04-13 11:00:00	0.29	0.673913
2019-04-13 12:00:00	0.22	0.43375
2019-04-13 13:00:00	-0.03	0.104788
2019-04-13 14:00:00	-0.38	-0.256241
2019-04-13 15:00:00	-0.71	-0.628724
2019-04-13 16:00:00	-0.95	-0.963681
2019-04-13 17:00:00	-1.03	-1.21777
2019-04-13 18:00:00	-0.88	-1.19082
2019-04-13 19:00:00	-0.46	-0.67261
2019-04-13 20:00:00	0.14	-0.213374
2019-04-13 21:00:00	0.75	0.314246
2019-04-13 22:00:00	1.23	0.880676
2019-04-13 23:00:00	1.52	1.32058
2019-04-14	1.59	1.4608
2019-04-14 01:00:00	1.39	1.20998
2019-04-14 02:00:00	0.93	0.852511
2019-04-14 03:00:00	0.35	0.489793
2019-04-14 04:00:00	-0.17	0.0882345
2019-04-14 05:00:00	-0.57	-0.284692
2019-04-14 06:00:00	-0.81	-0.593782
2019-04-14 07:00:00	-0.9	-0.798721
2019-04-14 08:00:00	-0.81	-0.659017
2019-04-14 09:00:00	-0.57	-0.278397
2019-04-14 10:00:00	-0.27	0.0317879
2019-04-14 11:00:00	0.01	0.344122
2019-04-14 12:00:00	0.18	0.588901
2019-04-14 13:00:00	0.21	0.500923
2019-04-14 14:00:00	0.08	0.201795
2019-04-14 15:00:00	-0.19	-0.132195
2019-04-14 16:00:00	-0.51	-0.493276
2019-04-14 17:00:00	-0.78	-0.837485
2019-04-14 18:00:00	-0.91	-1.11839
2019-04-14 19:00:00	-0.83	-1.24534
2019-04-14 20:00:00	-0.52	-0.821595
2019-04-14 21:00:00	-0.03	-0.358986
2019-04-14 22:00:00	0.51	0.139124
2019-04-14 23:00:00	1	0.70748
2019-04-15	1.36	1.20517
2019-04-15 01:00:00	1.52	1.45375
2019-04-15 02:00:00	1.42	1.3192
2019-04-15 03:00:00	1.06	0.952094
2019-04-15 04:00:00	0.53	0.599857
2019-04-15 05:00:00	0	0.196954
2019-04-15 06:00:00	-0.45	-0.198019
2019-04-15 07:00:00	-0.77	-0.537685
2019-04-15 08:00:00	-0.95	-0.799159
2019-04-15 09:00:00	-0.93	-0.839787
2019-04-15 10:00:00	-0.72	-0.410369
2019-04-15 11:00:00	-0.4	-0.063423
2019-04-15 12:00:00	-0.06	0.288775
2019-04-15 13:00:00	0.23	0.625609
2019-04-15 14:00:00	0.39	0.730536
2019-04-15 15:00:00	0.34	0.467311
2019-04-15 16:00:00	0.09	0.127799
2019-04-15 17:00:00	-0.28	-0.23607
2019-04-15 18:00:00	-0.64	-0.608552
2019-04-15 19:00:00	-0.87	-0.940062
2019-04-15 20:00:00	-0.91	-1.17791
2019-04-15 21:00:00	-0.72	-0.990322
2019-04-15 22:00:00	-0.32	-0.484225
2019-04-15 23:00:00	0.22	-0.0054584
2019-04-16	0.77	0.55417
2019-04-16 01:00:00	1.22	1.10606
2019-04-16 02:00:00	1.49	1.45432
2019-04-16 03:00:00	1.49	1.40066
2019-04-16 04:00:00	1.18	1.0137
2019-04-16 05:00:00	0.66	0.648489
2019-04-16 06:00:00	0.08	0.234074
2019-04-16 07:00:00	-0.44	-0.183834
2019-04-16 08:00:00	-0.84	-0.549294
2019-04-16 09:00:00	-1.07	-0.841734
2019-04-16 10:00:00	-1.07	-0.93009
2019-04-16 11:00:00	-0.83	-0.422682
2019-04-16 12:00:00	-0.43	-0.0204922
2019-04-16 13:00:00	0.04	0.39665
2019-04-16 14:00:00	0.46	0.814955
2019-04-16 15:00:00	0.72	1.0032
2019-04-16 16:00:00	0.69	0.745757
2019-04-16 17:00:00	0.38	0.37141
2019-04-16 18:00:00	-0.1	-0.00895167
2019-04-16 19:00:00	-0.56	-0.41464
2019-04-16 20:00:00	-0.92	-0.785658
2019-04-16 21:00:00	-1.08	-1.08097
2019-04-16 22:00:00	-0.98	-1.12139
2019-04-16 23:00:00	-0.59	-0.522602
2019-04-17	-0.01	-0.0330493
2019-04-17 01:00:00	0.62	0.51599
2019-04-17 02:00:00	1.16	1.09459
2019-04-17 03:00:00	1.51	1.4824
2019-04-17 04:00:00	1.55	1.42479
2019-04-17 05:00:00	1.23	1.00271
2019-04-17 06:00:00	0.66	0.62279
2019-04-17 07:00:00	0.02	0.187967
2019-04-17 08:00:00	-0.55	-0.245644
2019-04-17 09:00:00	-0.99	-0.62298
2019-04-17 10:00:00	-1.23	-0.923812
2019-04-17 11:00:00	-1.18	-0.922829
2019-04-17 12:00:00	-0.85	-0.322867
2019-04-17 13:00:00	-0.32	0.121631
2019-04-17 14:00:00	0.29	0.615095
2019-04-17 15:00:00	0.81	1.08897
2019-04-17 16:00:00	1.09	1.2562
2019-04-17 17:00:00	1.01	0.925766
2019-04-17 18:00:00	0.59	0.529312
2019-04-17 19:00:00	0	0.124692
2019-04-17 20:00:00	-0.58	-0.310333
2019-04-17 21:00:00	-1.03	-0.702935
2019-04-17 22:00:00	-1.26	-1.02301
2019-04-17 23:00:00	-1.18	-1.11756
2019-04-18	-0.77	-0.469405
2019-04-18 01:00:00	-0.13	0.0371756
2019-04-18 02:00:00	0.57	0.593967
2019-04-18 03:00:00	1.17	1.17661
2019-04-18 04:00:00	1.54	1.53409
2019-04-18 05:00:00	1.55	1.37021
2019-04-18 06:00:00	1.18	0.926238
2019-04-18 07:00:00	0.54	0.532643
2019-04-18 08:00:00	-0.16	0.075952
2019-04-18 09:00:00	-0.76	-0.361683
2019-04-18 10:00:00	-1.18	-0.736373
2019-04-18 11:00:00	-1.36	-1.02439
2019-04-18 12:00:00	-1.22	-0.747541
2019-04-18 13:00:00	-0.75	-0.173283
2019-04-18 14:00:00	-0.07	0.322985
2019-04-18 15:00:00	0.64	0.891511
2019-04-18 16:00:00	1.19	1.36996
2019-04-18 17:00:00	1.41	1.43495
2019-04-18 18:00:00	1.22	1.00998
2019-04-18 19:00:00	0.68	0.610615
2019-04-18 20:00:00	-0.02	0.172093
2019-04-18 21:00:00	-0.67	-0.280348
2019-04-18 22:00:00	-1.16	-0.67913
2019-04-18 23:00:00	-1.39	-1.0037
2019-04-19	-1.29	-1.01386
2019-04-19 01:00:00	-0.83	-0.346754
2019-04-19 02:00:00	-0.13	0.168732
2019-04-19 03:00:00	0.61	0.741159
2019-04-19 04:00:00	1.21	1.30336
2019-04-19 05:00:00	1.53	1.5569
2019-04-19 06:00:00	1.46	1.23153
2019-04-19 07:00:00	1	0.804908
2019-04-19 08:00:00	0.3	0.385328
2019-04-19 09:00:00	-0.41	-0.0822906
2019-04-19 10:00:00	-0.98	-0.510992
2019-04-19 11:00:00	-1.33	-0.871861
2019-04-19 12:00:00	-1.41	-1.11007
2019-04-19 13:00:00	-1.13	-0.56259
2019-04-19 14:00:00	-0.52	0.0158819
2019-04-19 15:00:00	0.27	0.576262
2019-04-19 16:00:00	1.02	1.18519
2019-04-19 17:00:00	1.51	1.60408
2019-04-19 18:00:00	1.62	1.49101
2019-04-19 19:00:00	1.29	1.02673
2019-04-19 20:00:00	0.63	0.624421
2019-04-19 21:00:00	-0.13	0.152816
2019-04-19 22:00:00	-0.79	-0.302864
2019-04-19 23:00:00	-1.26	-0.695622
2019-04-20	-1.45	-1.00887
2019-04-20 01:00:00	-1.3	-0.78865
2019-04-20 02:00:00	-0.79	-0.183586
2019-04-20 03:00:00	-0.06	0.324191
2019-04-20 04:00:00	0.67	0.909196
2019-04-20 05:00:00	1.22	1.40894
2019-04-20 06:00:00	1.45	1.48667
2019-04-20 07:00:00	1.28	1.04768
2019-04-20 08:00:00	0.74	0.642538
2019-04-20 09:00:00	0.01	0.192764
2019-04-20 10:00:00	-0.66	-0.270586
2019-04-20 11:00:00	-1.15	-0.679534
2019-04-20 12:00:00	-1.4	-1.0163
2019-04-20 13:00:00	-1.35	-1.02853
2019-04-20 14:00:00	-0.91	-0.330736
2019-04-20 15:00:00	-0.17	0.220387
2019-04-20 16:00:00	0.68	0.835665
2019-04-20 17:00:00	1.37	1.44445
2019-04-20 18:00:00	1.74	1.74636
2019-04-20 19:00:00	1.7	1.43755
2019-04-20 20:00:00	1.24	0.998641
2019-04-20 21:00:00	0.5	0.566583
2019-04-20 22:00:00	-0.28	0.0845904
2019-04-20 23:00:00	-0.91	-0.36139
2019-04-21	-1.32	-0.739645
2019-04-21 01:00:00	-1.46	-1.01885
2019-04-21 02:00:00	-1.24	-0.615088
2019-04-21 03:00:00	-0.69	-0.0218734
2019-04-21 04:00:00	0.04	0.493806
2019-04-21 05:00:00	0.72	1.05441
2019-04-21 06:00:00	1.17	1.44168
2019-04-21 07:00:00	1.29	1.29149
2019-04-21 08:00:00	1.01	0.842034
2019-04-21 09:00:00	0.41	0.437003
2019-04-21 10:00:00	-0.29	-0.0300834
2019-04-21 11:00:00	-0.88	-0.475059
2019-04-21 12:00:00	-1.25	-0.856901
2019-04-21 13:00:00	-1.38	-1.1515
2019-04-21 14:00:00	-1.17	-0.791331
2019-04-21 15:00:00	-0.58	-0.163188
2019-04-21 16:00:00	0.26	0.411868
2019-04-21 17:00:00	1.08	1.07016
2019-04-21 18:00:00	1.66	1.62401
2019-04-21 19:00:00	1.88	1.76119
2019-04-21 20:00:00	1.69	1.3303
2019-04-21 21:00:00	1.11	0.922021
2019-04-21 22:00:00	0.32	0.462641
2019-04-21 23:00:00	-0.43	-0.0165976
2019-04-22	-0.99	-0.442848
2019-04-22 01:00:00	-1.33	-0.798137
2019-04-22 02:00:00	-1.41	-0.990843
2019-04-22 03:00:00	-1.14	-0.362459
2019-04-22 04:00:00	-0.56	0.140043
2019-04-22 05:00:00	0.13	0.637371
2019-04-22 06:00:00	0.72	1.1465
2019-04-22 07:00:00	1.05	1.36713
2019-04-22 08:00:00	1.05	1.02734
2019-04-22 09:00:00	0.67	0.615591
2019-04-22 10:00:00	0.05	0.193564
2019-04-22 11:00:00	-0.58	-0.26657
2019-04-22 12:00:00	-1.05	-0.682954
2019-04-22 13:00:00	-1.31	-1.03135
2019-04-22 14:00:00	-1.29	-1.21938
2019-04-22 15:00:00	-0.91	-0.554173
2019-04-22 16:00:00	-0.17	0.00510393
2019-04-22 17:00:00	0.69	0.605916
2019-04-22 18:00:00	1.42	1.2544
2019-04-22 19:00:00	1.87	1.71008
2019-04-22 20:00:00	1.95	1.65621
2019-04-22 21:00:00	1.62	1.19426
2019-04-22 22:00:00	0.94	0.795826
2019-04-22 23:00:00	0.14	0.329012
2019-04-23	-0.54	-0.133389
2019-04-23 01:00:00	-1.02	-0.532591
2019-04-23 02:00:00	-1.29	-0.852915
2019-04-23 03:00:00	-1.3	-0.824132
2019-04-23 04:00:00	-0.99	-0.19857
2019-04-23 05:00:00	-0.42	0.242404
2019-04-23 06:00:00	0.2	0.725928
2019-04-23 07:00:00	0.68	1.15139
2019-04-23 08:00:00	0.89	1.16362
2019-04-23 09:00:00	0.76	0.758576
2019-04-23 10:00:00	0.31	0.367349
2019-04-23 11:00:00	-0.29	-0.0648201
2019-04-23 12:00:00	-0.82	-0.501684
2019-04-23 13:00:00	-1.18	-0.882598
2019-04-23 14:00:00	-1.32	-1.18504
2019-04-23 15:00:00	-1.14	-0.998099
2019-04-23 16:00:00	-0.59	-0.40465
2019-04-23 17:00:00	0.23	0.136973
2019-04-23 18:00:00	1.05	0.766183
2019-04-23 19:00:00	1.67	1.37021
2019-04-23 20:00:00	1.97	1.69802
2019-04-23 21:00:00	1.91	1.4836
2019-04-23 22:00:00	1.47	1.04893
2019-04-23 23:00:00	0.74	0.647534
2019-04-24	0	0.188794
2019-04-24 01:00:00	-0.59	-0.246198
2019-04-24 02:00:00	-0.98	-0.612475
2019-04-24 03:00:00	-1.19	-0.879056
2019-04-24 04:00:00	-1.13	-0.614392
2019-04-24 05:00:00	-0.79	-0.104255
2019-04-24 06:00:00	-0.27	0.301054
2019-04-24 07:00:00	0.26	0.739046
2019-04-24 08:00:00	0.62	1.04537
2019-04-24 09:00:00	0.7	0.88087
2019-04-24 10:00:00	0.45	0.493483
2019-04-24 11:00:00	-0.03	0.108956
2019-04-24 12:00:00	-0.56	-0.315771
2019-04-24 13:00:00	-0.99	-0.718636
2019-04-24 14:00:00	-1.25	-1.05752
2019-04-24 15:00:00	-1.27	-1.28009
2019-04-24 16:00:00	-0.94	-0.841141
2019-04-24 17:00:00	-0.27	-0.287704
2019-04-24 18:00:00	0.55	0.260041
2019-04-24 19:00:00	1.28	0.882685
2019-04-24 20:00:00	1.77	1.41034
2019-04-24 21:00:00	1.95	1.60579
2019-04-24 22:00:00	1.77	1.3029
2019-04-24 23:00:00	1.25	0.906038
2019-04-25	0.55	0.507049
2019-04-25 01:00:00	-0.1	0.0691088
2019-04-25 02:00:00	-0.59	-0.332166
2019-04-25 03:00:00	-0.9	-0.660011
2019-04-25 04:00:00	-1.03	-0.853123
2019-04-25 05:00:00	-0.93	-0.485433
2019-04-25 06:00:00	-0.59	-0.067234
2019-04-25 07:00:00	-0.12	0.296715
2019-04-25 08:00:00	0.31	0.667299
2019-04-25 09:00:00	0.56	0.841369
2019-04-25 10:00:00	0.51	0.592165
2019-04-25 11:00:00	0.2	0.239496
2019-04-25 12:00:00	-0.26	-0.138099
2019-04-25 13:00:00	-0.7	-0.535938
2019-04-25 14:00:00	-1.06	-0.897511
2019-04-25 15:00:00	-1.24	-1.18297
2019-04-25 16:00:00	-1.15	-1.21894
2019-04-25 17:00:00	-0.71	-0.651245
2019-04-25 18:00:00	-0.01	-0.173525
2019-04-25 19:00:00	0.74	0.365701
2019-04-25 20:00:00	1.34	0.944532
2019-04-25 21:00:00	1.72	1.38231
2019-04-25 22:00:00	1.8	1.4733
2019-04-25 23:00:00	1.54	1.15257
2019-04-26	1	0.789125
2019-04-26 01:00:00	0.38	0.405637
2019-04-26 02:00:00	-0.16	-0.00285831
2019-04-26 03:00:00	-0.55	-0.368314
2019-04-26 04:00:00	-0.8	-0.657338
2019-04-26 05:00:00	-0.87	-0.789593
2019-04-26 06:00:00	-0.73	-0.449955
2019-04-26 07:00:00	-0.42	-0.112383
2019-04-26 08:00:00	-0.01	0.194581
2019-04-26 09:00:00	0.33	0.486788
2019-04-26 10:00:00	0.48	0.575707
2019-04-26 11:00:00	0.37	0.334389
2019-04-26 12:00:00	0.05	0.018204
2019-04-26 13:00:00	-0.33	-0.335884
2019-04-26 14:00:00	-0.7	-0.694896
2019-04-26 15:00:00	-1	-1.00902
2019-04-26 16:00:00	-1.12	-1.22309
2019-04-26 17:00:00	-0.96	-1.01767
2019-04-26 18:00:00	-0.48	-0.548969
2019-04-26 19:00:00	0.16	-0.0948263
2019-04-26 20:00:00	0.78	0.435421
2019-04-26 21:00:00	1.27	0.959882
2019-04-26 22:00:00	1.56	1.3126
2019-04-26 23:00:00	1.56	1.35159
2019-04-27	1.27	1.06105
2019-04-27 01:00:00	0.78	0.72703
2019-04-27 02:00:00	0.27	0.370455
2019-04-27 03:00:00	-0.18	-0.00702117
2019-04-27 04:00:00	-0.51	-0.343323
2019-04-27 05:00:00	-0.7	-0.608425
2019-04-27 06:00:00	-0.74	-0.740263
2019-04-27 07:00:00	-0.61	-0.54159
2019-04-27 08:00:00	-0.34	-0.260021
2019-04-27 09:00:00	0.01	-0.0118972
2019-04-27 10:00:00	0.31	0.210605
2019-04-27 11:00:00	0.41	0.311184
2019-04-27 12:00:00	0.3	0.145218
2019-04-27 13:00:00	0.05	-0.114576
2019-04-27 14:00:00	-0.24	-0.422384
2019-04-27 15:00:00	-0.56	-0.737234
2019-04-27 16:00:00	-0.83	-1.00318
2019-04-27 17:00:00	-0.92	-1.14443
2019-04-27 18:00:00	-0.74	-0.873181
2019-04-27 19:00:00	-0.32	-0.465826
2019-04-27 20:00:00	0.2	-0.0369546
2019-04-27 21:00:00	0.71	0.462153
2019-04-27 22:00:00	1.12	0.933149
2019-04-27 23:00:00	1.35	1.23568
2019-04-28	1.32	1.27802
2019-04-28 01:00:00	1.05	1.0408
2019-04-28 02:00:00	0.65	0.730631
2019-04-28 03:00:00	0.22	0.400663
2019-04-28 04:00:00	-0.17	0.0447217
2019-04-28 05:00:00	-0.48	-0.281292
2019-04-28 06:00:00	-0.67	-0.549937
2019-04-28 07:00:00	-0.72	-0.725044
2019-04-28 08:00:00	-0.61	-0.699784
2019-04-28 09:00:00	-0.36	-0.465462
2019-04-28 10:00:00	-0.03	-0.236955
2019-04-28 11:00:00	0.25	-0.0332601
2019-04-28 12:00:00	0.37	0.135954
2019-04-28 13:00:00	0.33	0.137035
2019-04-28 14:00:00	0.18	-0.0465227
2019-04-28 15:00:00	-0.05	-0.293102
2019-04-28 16:00:00	-0.35	-0.570804
2019-04-28 17:00:00	-0.62	-0.821775
2019-04-28 18:00:00	-0.72	-0.969109
2019-04-28 19:00:00	-0.58	-0.796111
2019-04-28 20:00:00	-0.26	-0.427241
2019-04-28 21:00:00	0.15	-0.036263
2019-04-28 22:00:00	0.59	0.420243
2019-04-28 23:00:00	0.96	0.872351
2019-04-29	1.17	1.17771
2019-04-29 01:00:00	1.16	1.25926
2019-04-29 02:00:00	0.95	1.06766
2019-04-29 03:00:00	0.61	0.763086
2019-04-29 04:00:00	0.22	0.441932
2019-04-29 05:00:00	-0.16	0.087202
2019-04-29 06:00:00	-0.49	-0.249912
2019-04-29 07:00:00	-0.71	-0.539105
2019-04-29 08:00:00	-0.79	-0.754811
2019-04-29 09:00:00	-0.7	-0.815222
2019-04-29 10:00:00	-0.45	-0.591815
2019-04-29 11:00:00	-0.11	-0.32629
2019-04-29 12:00:00	0.22	-0.073723
2019-04-29 13:00:00	0.42	0.178713
2019-04-29 14:00:00	0.47	0.33478
2019-04-29 15:00:00	0.39	0.242939
2019-04-29 16:00:00	0.16	0.00727
2019-04-29 17:00:00	-0.16	-0.26858
2019-04-29 18:00:00	-0.46	-0.548617
2019-04-29 19:00:00	-0.6	-0.776648
2019-04-29 20:00:00	-0.54	-0.824697
2019-04-29 21:00:00	-0.31	-0.49003
2019-04-29 22:00:00	0.05	-0.115408
2019-04-29 23:00:00	0.47	0.300827
2019-04-30	0.85	0.762144
2019-04-30 01:00:00	1.09	1.1275
2019-04-30 02:00:00	1.11	1.26129
2019-04-30 03:00:00	0.95	1.08496
2019-04-30 04:00:00	0.64	0.757236
2019-04-30 05:00:00	0.24	0.422908
2019-04-30 06:00:00	-0.19	0.0515091
2019-04-30 07:00:00	-0.56	-0.304161
2019-04-30 08:00:00	-0.81	-0.609165
2019-04-30 09:00:00	-0.91	-0.840205
2019-04-30 10:00:00	-0.81	-0.887507
2019-04-30 11:00:00	-0.52	-0.555153
2019-04-30 12:00:00	-0.12	-0.235241
2019-04-30 13:00:00	0.28	0.0897741
2019-04-30 14:00:00	0.56	0.422871
2019-04-30 15:00:00	0.68	0.627214
2019-04-30 16:00:00	0.59	0.523452
2019-04-30 17:00:00	0.32	0.234575
2019-04-30 18:00:00	-0.06	-0.0794786
2019-04-30 19:00:00	-0.41	-0.401342
2019-04-30 20:00:00	-0.61	-0.689478
2019-04-30 21:00:00	-0.61	-0.854245
2019-04-30 22:00:00	-0.42	-0.595288
2019-04-30 23:00:00	-0.06	-0.1834
2019-05-01	0.39	0.228302

## Sheet: juhuadao
2019-04-01	0.78	0.761019
2019-04-01 01:00:00	1.01	1.03909
2019-04-01 02:00:00	1.06	1.12714
2019-04-01 03:00:00	0.9	0.9547
2019-04-01 04:00:00	0.59	0.738564
2019-04-01 05:00:00	0.18	0.499378
2019-04-01 06:00:00	-0.24	0.154441
2019-04-01 07:00:00	-0.61	-0.251752
2019-04-01 08:00:00	-0.85	-0.582695
2019-04-01 09:00:00	-0.92	-0.684117
2019-04-01 10:00:00	-0.78	-0.377143
2019-04-01 11:00:00	-0.49	-0.0854941
2019-04-01 12:00:00	-0.13	0.0336759
2019-04-01 13:00:00	0.18	0.106691
2019-04-01 14:00:00	0.38	0.155098
2019-04-01 15:00:00	0.39	0.0756431
2019-04-01 16:00:00	0.22	-0.0968261
2019-04-01 17:00:00	-0.11	-0.238315
2019-04-01 18:00:00	-0.48	-0.46452
2019-04-01 19:00:00	-0.75	-0.767523
2019-04-01 20:00:00	-0.86	-0.968137
2019-04-01 21:00:00	-0.77	-0.687894
2019-04-01 22:00:00	-0.49	-0.156478
2019-04-01 23:00:00	-0.06	0.183275
2019-04-02	0.41	0.502333
2019-04-02 01:00:00	0.81	0.83799
2019-04-02 02:00:00	1.06	1.08899
2019-04-02 03:00:00	1.09	1.10917
2019-04-02 04:00:00	0.9	0.847747
2019-04-02 05:00:00	0.52	0.626444
2019-04-02 06:00:00	0.05	0.367073
2019-04-02 07:00:00	-0.4	-0.0193339
2019-04-02 08:00:00	-0.77	-0.446974
2019-04-02 09:00:00	-0.99	-0.749687
2019-04-02 10:00:00	-0.98	-0.694299
2019-04-02 11:00:00	-0.75	-0.173705
2019-04-02 12:00:00	-0.35	0.105702
2019-04-02 13:00:00	0.08	0.245837
2019-04-02 14:00:00	0.44	0.37489
2019-04-02 15:00:00	0.62	0.417565
2019-04-02 16:00:00	0.59	0.225868
2019-04-02 17:00:00	0.31	0.0252802
2019-04-02 18:00:00	-0.12	-0.156426
2019-04-02 19:00:00	-0.55	-0.4454
2019-04-02 20:00:00	-0.86	-0.80132
2019-04-02 21:00:00	-0.97	-0.999804
2019-04-02 22:00:00	-0.84	-0.563872
2019-04-02 23:00:00	-0.5	0.00511488
2019-04-03	-0.02	0.337224
2019-04-03 01:00:00	0.5	0.658964
2019-04-03 02:00:00	0.91	0.972063
2019-04-03 03:00:00	1.13	1.14678
2019-04-03 04:00:00	1.09	1.0041
2019-04-03 05:00:00	0.8	0.69635
2019-04-03 06:00:00	0.33	0.479738
2019-04-03 07:00:00	-0.17	0.165374
2019-04-03 08:00:00	-0.63	-0.274326
2019-04-03 09:00:00	-0.96	-0.68974
2019-04-03 10:00:00	-1.08	-0.871411
2019-04-03 11:00:00	-0.94	-0.409015
2019-04-03 12:00:00	-0.58	0.0996226
2019-04-03 13:00:00	-0.08	0.318016
2019-04-03 14:00:00	0.39	0.508486
2019-04-03 15:00:00	0.71	0.64694
2019-04-03 16:00:00	0.82	0.587409
2019-04-03 17:00:00	0.67	0.2804
2019-04-03 18:00:00	0.27	0.0894929
2019-04-03 19:00:00	-0.25	-0.151223
2019-04-03 20:00:00	-0.71	-0.523929
2019-04-03 21:00:00	-0.99	-0.902519
2019-04-03 22:00:00	-1.05	-0.98645
2019-04-03 23:00:00	-0.84	-0.31814
2019-04-04	-0.41	0.215718
2019-04-04 01:00:00	0.14	0.518261
2019-04-04 02:00:00	0.66	0.846139
2019-04-04 03:00:00	1.03	1.10408
2019-04-04 04:00:00	1.16	1.13319
2019-04-04 05:00:00	1	0.788681
2019-04-04 06:00:00	0.59	0.543163
2019-04-04 07:00:00	0.06	0.297538
2019-04-04 08:00:00	-0.46	-0.0980541
2019-04-04 09:00:00	-0.86	-0.567668
2019-04-04 10:00:00	-1.09	-0.909645
2019-04-04 11:00:00	-1.06	-0.742871
2019-04-04 12:00:00	-0.77	-0.026232
2019-04-04 13:00:00	-0.28	0.341527
2019-04-04 14:00:00	0.26	0.568235
2019-04-04 15:00:00	0.71	0.789201
2019-04-04 16:00:00	0.94	0.860941
2019-04-04 17:00:00	0.91	0.594369
2019-04-04 18:00:00	0.61	0.312559
2019-04-04 19:00:00	0.09	0.10376
2019-04-04 20:00:00	-0.46	-0.229519
2019-04-04 21:00:00	-0.89	-0.667511
2019-04-04 22:00:00	-1.1	-1.00573
2019-04-04 23:00:00	-1.05	-0.772178
2019-04-05	-0.73	-0.0121666
2019-04-05 01:00:00	-0.22	0.415004
2019-04-05 02:00:00	0.36	0.715044
2019-04-05 03:00:00	0.84	1.02125
2019-04-05 04:00:00	1.11	1.1714
2019-04-05 05:00:00	1.1	0.960098
2019-04-05 06:00:00	0.8	0.602732
2019-04-05 07:00:00	0.29	0.385129
2019-04-05 08:00:00	-0.27	0.0572341
2019-04-05 09:00:00	-0.73	-0.410688
2019-04-05 10:00:00	-1.04	-0.850217
2019-04-05 11:00:00	-1.12	-0.987415
2019-04-05 12:00:00	-0.92	-0.283745
2019-04-05 13:00:00	-0.47	0.298291
2019-04-05 14:00:00	0.1	0.569044
2019-04-05 15:00:00	0.63	0.850928
2019-04-05 16:00:00	0.98	1.03362
2019-04-05 17:00:00	1.08	0.939698
2019-04-05 18:00:00	0.88	0.544699
2019-04-05 19:00:00	0.42	0.327678
2019-04-05 20:00:00	-0.16	0.0557827
2019-04-05 21:00:00	-0.69	-0.37199
2019-04-05 22:00:00	-1.04	-0.824632
2019-04-05 23:00:00	-1.15	-1.0291
2019-04-06	-0.97	-0.359486
2019-04-06 01:00:00	-0.54	0.286238
2019-04-06 02:00:00	0.02	0.593215
2019-04-06 03:00:00	0.58	0.902188
2019-04-06 04:00:00	0.97	1.13296
2019-04-06 05:00:00	1.11	1.10184
2019-04-06 06:00:00	0.95	0.692264
2019-04-06 07:00:00	0.51	0.444122
2019-04-06 08:00:00	-0.06	0.185588
2019-04-06 09:00:00	-0.58	-0.23715
2019-04-06 10:00:00	-0.96	-0.72758
2019-04-06 11:00:00	-1.13	-1.0601
2019-04-06 12:00:00	-1.03	-0.648716
2019-04-06 13:00:00	-0.66	0.136496
2019-04-06 14:00:00	-0.1	0.521167
2019-04-06 15:00:00	0.5	0.82837
2019-04-06 16:00:00	0.96	1.11004
2019-04-06 17:00:00	1.18	1.18938
2019-04-06 18:00:00	1.11	0.852042
2019-04-06 19:00:00	0.74	0.539419
2019-04-06 20:00:00	0.17	0.315882
2019-04-06 21:00:00	-0.42	-0.0545018
2019-04-06 22:00:00	-0.88	-0.542521
2019-04-06 23:00:00	-1.13	-0.944249
2019-04-07	-1.11	-0.841476
2019-04-07 01:00:00	-0.81	-0.0164577
2019-04-07 02:00:00	-0.31	0.478369
2019-04-07 03:00:00	0.27	0.754438
2019-04-07 04:00:00	0.75	1.03421
2019-04-07 05:00:00	1.02	1.14114
2019-04-07 06:00:00	1.02	0.85848
2019-04-07 07:00:00	0.71	0.496382
2019-04-07 08:00:00	0.17	0.278606
2019-04-07 09:00:00	-0.4	-0.0712443
2019-04-07 10:00:00	-0.87	-0.558795
2019-04-07 11:00:00	-1.13	-1.00211
2019-04-07 12:00:00	-1.13	-1.06034
2019-04-07 13:00:00	-0.84	-0.217931
2019-04-07 14:00:00	-0.32	0.40195
2019-04-07 15:00:00	0.31	0.7271
2019-04-07 16:00:00	0.87	1.07792
2019-04-07 17:00:00	1.23	1.30055
2019-04-07 18:00:00	1.29	1.20294
2019-04-07 19:00:00	1.04	0.762624
2019-04-07 20:00:00	0.53	0.536605
2019-04-07 21:00:00	-0.09	0.253861
2019-04-07 22:00:00	-0.63	-0.19962
2019-04-07 23:00:00	-1	-0.691886
2019-04-08	-1.14	-0.979844
2019-04-08 01:00:00	-1.01	-0.419745
2019-04-08 02:00:00	-0.61	0.299384
2019-04-08 03:00:00	-0.07	0.605297
2019-04-08 04:00:00	0.48	0.875595
2019-04-08 05:00:00	0.86	1.07373
2019-04-08 06:00:00	0.99	1.00327
2019-04-08 07:00:00	0.84	0.576978
2019-04-08 08:00:00	0.41	0.334909
2019-04-08 09:00:00	-0.18	0.0692476
2019-04-08 10:00:00	-0.72	-0.364358
2019-04-08 11:00:00	-1.08	-0.859507
2019-04-08 12:00:00	-1.21	-1.18484
2019-04-08 13:00:00	-1.04	-0.653568
2019-04-08 14:00:00	-0.58	0.148476
2019-04-08 15:00:00	0.04	0.5627
2019-04-08 16:00:00	0.69	0.928035
2019-04-08 17:00:00	1.19	1.26509
2019-04-08 18:00:00	1.41	1.39433
2019-04-08 19:00:00	1.32	1.09075
2019-04-08 20:00:00	0.91	0.734584
2019-04-08 21:00:00	0.31	0.51497
2019-04-08 22:00:00	-0.31	0.155441
2019-04-08 23:00:00	-0.78	-0.345367
2019-04-09	-1.06	-0.792775
2019-04-09 01:00:00	-1.1	-0.876019
2019-04-09 02:00:00	-0.86	-0.10743
2019-04-09 03:00:00	-0.41	0.442139
2019-04-09 04:00:00	0.14	0.677951
2019-04-09 05:00:00	0.61	0.915286
2019-04-09 06:00:00	0.88	1.00252
2019-04-09 07:00:00	0.88	0.734066
2019-04-09 08:00:00	0.61	0.373499
2019-04-09 09:00:00	0.09	0.16012
2019-04-09 10:00:00	-0.49	-0.179501
2019-04-09 11:00:00	-0.97	-0.658655
2019-04-09 12:00:00	-1.22	-1.1043
2019-04-09 13:00:00	-1.2	-1.18422
2019-04-09 14:00:00	-0.87	-0.333762
2019-04-09 15:00:00	-0.29	0.319056
2019-04-09 16:00:00	0.39	0.680459
2019-04-09 17:00:00	1.02	1.07696
2019-04-09 18:00:00	1.42	1.36835
2019-04-09 19:00:00	1.52	1.38043
2019-04-09 20:00:00	1.28	0.971333
2019-04-09 21:00:00	0.76	0.716241
2019-04-09 22:00:00	0.12	0.469074
2019-04-09 23:00:00	-0.46	0.0516893
2019-04-10	-0.87	-0.450993
2019-04-10 01:00:00	-1.06	-0.823815
2019-04-10 02:00:00	-1.01	-0.644244
2019-04-10 03:00:00	-0.71	0.122828
2019-04-10 04:00:00	-0.23	0.485164
2019-04-10 05:00:00	0.28	0.685299
2019-04-10 06:00:00	0.66	0.857503
2019-04-10 07:00:00	0.81	0.825575
2019-04-10 08:00:00	0.71	0.44996
2019-04-10 09:00:00	0.35	0.204272
2019-04-10 10:00:00	-0.19	-0.0353695
2019-04-10 11:00:00	-0.74	-0.433843
2019-04-10 12:00:00	-1.13	-0.912539
2019-04-10 13:00:00	-1.27	-1.26453
2019-04-10 14:00:00	-1.11	-0.937427
2019-04-10 15:00:00	-0.66	-0.11619
2019-04-10 16:00:00	-0.01	0.375041
2019-04-10 17:00:00	0.69	0.751418
2019-04-10 18:00:00	1.25	1.14398
2019-04-10 19:00:00	1.55	1.39157
2019-04-10 20:00:00	1.54	1.30993
2019-04-10 21:00:00	1.21	0.913315
2019-04-10 22:00:00	0.63	0.700916
2019-04-10 23:00:00	0	0.422436
2019-04-11	-0.52	-0.0197777
2019-04-11 01:00:00	-0.87	-0.494617
2019-04-11 02:00:00	-1.01	-0.782973
2019-04-11 03:00:00	-0.9	-0.436519
2019-04-11 04:00:00	-0.58	0.204901
2019-04-11 05:00:00	-0.13	0.443231
2019-04-11 06:00:00	0.31	0.60675
2019-04-11 07:00:00	0.6	0.709163
2019-04-11 08:00:00	0.67	0.580892
2019-04-11 09:00:00	0.5	0.237253
2019-04-11 10:00:00	0.11	0.0399009
2019-04-11 11:00:00	-0.41	-0.231765
2019-04-11 12:00:00	-0.89	-0.651189
2019-04-11 13:00:00	-1.19	-1.09356
2019-04-11 14:00:00	-1.22	-1.32308
2019-04-11 15:00:00	-0.97	-0.715814
2019-04-11 16:00:00	-0.46	-0.0331548
2019-04-11 17:00:00	0.2	0.357132
2019-04-11 18:00:00	0.87	0.750625
2019-04-11 19:00:00	1.36	1.12902
2019-04-11 20:00:00	1.59	1.34897
2019-04-11 21:00:00	1.52	1.24379
2019-04-11 22:00:00	1.14	0.904198
2019-04-11 23:00:00	0.57	0.702659
2019-04-12	-0.02	0.41472
2019-04-12 01:00:00	-0.5	-0.0229501
2019-04-12 02:00:00	-0.8	-0.465156
2019-04-12 03:00:00	-0.91	-0.705418
2019-04-12 04:00:00	-0.8	-0.378611
2019-04-12 05:00:00	-0.51	0.14736
2019-04-12 06:00:00	-0.12	0.331871
2019-04-12 07:00:00	0.24	0.447281
2019-04-12 08:00:00	0.46	0.500205
2019-04-12 09:00:00	0.49	0.348436
2019-04-12 10:00:00	0.31	0.0712677
2019-04-12 11:00:00	-0.06	-0.10517
2019-04-12 12:00:00	-0.52	-0.380475
2019-04-12 13:00:00	-0.91	-0.785014
2019-04-12 14:00:00	-1.13	-1.17987
2019-04-12 15:00:00	-1.11	-1.31191
2019-04-12 16:00:00	-0.83	-0.672506
2019-04-12 17:00:00	-0.32	-0.0866182
2019-04-12 18:00:00	0.31	0.27684
2019-04-12 19:00:00	0.91	0.672481
2019-04-12 20:00:00	1.36	1.04803
2019-04-12 21:00:00	1.56	1.28
2019-04-12 22:00:00	1.47	1.22754
2019-04-12 23:00:00	1.11	0.937776
2019-04-13	0.6	0.742839
2019-04-13 01:00:00	0.06	0.469241
2019-04-13 02:00:00	-0.38	0.0579348
2019-04-13 03:00:00	-0.68	-0.368902
2019-04-13 04:00:00	-0.81	-0.632316
2019-04-13 05:00:00	-0.74	-0.482105
2019-04-13 06:00:00	-0.52	-0.0106424
2019-04-13 07:00:00	-0.2	0.176323
2019-04-13 08:00:00	0.09	0.252143
2019-04-13 09:00:00	0.28	0.28874
2019-04-13 10:00:00	0.32	0.193691
2019-04-13 11:00:00	0.19	-0.0350723
2019-04-13 12:00:00	-0.11	-0.188196
2019-04-13 13:00:00	-0.49	-0.428012
2019-04-13 14:00:00	-0.82	-0.788037
2019-04-13 15:00:00	-1.01	-1.15438
2019-04-13 16:00:00	-0.99	-1.29335
2019-04-13 17:00:00	-0.75	-0.757739
2019-04-13 18:00:00	-0.3	-0.209624
2019-04-13 19:00:00	0.27	0.151598
2019-04-13 20:00:00	0.82	0.538092
2019-04-13 21:00:00	1.25	0.926311
2019-04-13 22:00:00	1.47	1.20519
2019-04-13 23:00:00	1.43	1.249
2019-04-14	1.14	1.01414
2019-04-14 01:00:00	0.7	0.810033
2019-04-14 02:00:00	0.21	0.564638
2019-04-14 03:00:00	-0.23	0.188569
2019-04-14 04:00:00	-0.56	-0.243373
2019-04-14 05:00:00	-0.74	-0.575574
2019-04-14 06:00:00	-0.76	-0.628282
2019-04-14 07:00:00	-0.61	-0.232422
2019-04-14 08:00:00	-0.36	0.0347383
2019-04-14 09:00:00	-0.08	0.128929
2019-04-14 10:00:00	0.14	0.181294
2019-04-14 11:00:00	0.25	0.173525
2019-04-14 12:00:00	0.19	0.00384025
2019-04-14 13:00:00	-0.03	-0.161552
2019-04-14 14:00:00	-0.34	-0.338043
2019-04-14 15:00:00	-0.65	-0.63408
2019-04-14 16:00:00	-0.87	-0.997409
2019-04-14 17:00:00	-0.92	-1.23686
2019-04-14 18:00:00	-0.76	-0.971207
2019-04-14 19:00:00	-0.39	-0.360984
2019-04-14 20:00:00	0.1	0.0419797
2019-04-14 21:00:00	0.63	0.406485
2019-04-14 22:00:00	1.09	0.805548
2019-04-14 23:00:00	1.37	1.13476
2019-04-15	1.41	1.26923
2019-04-15 01:00:00	1.22	1.09753
2019-04-15 02:00:00	0.84	0.850378
2019-04-15 03:00:00	0.36	0.620962
2019-04-15 04:00:00	-0.11	0.27703
2019-04-15 05:00:00	-0.5	-0.165905
2019-04-15 06:00:00	-0.75	-0.562601
2019-04-15 07:00:00	-0.84	-0.742478
2019-04-15 08:00:00	-0.75	-0.433603
2019-04-15 09:00:00	-0.51	-0.0115563
2019-04-15 10:00:00	-0.19	0.166061
2019-04-15 11:00:00	0.11	0.270378
2019-04-15 12:00:00	0.31	0.345574
2019-04-15 13:00:00	0.34	0.265386
2019-04-15 14:00:00	0.19	0.0228738
2019-04-15 15:00:00	-0.11	-0.144715
2019-04-15 16:00:00	-0.46	-0.390936
2019-04-15 17:00:00	-0.76	-0.753969
2019-04-15 18:00:00	-0.92	-1.10073
2019-04-15 19:00:00	-0.86	-1.15167
2019-04-15 20:00:00	-0.58	-0.510984
2019-04-15 21:00:00	-0.12	0.0128713
2019-04-15 22:00:00	0.42	0.365223
2019-04-15 23:00:00	0.94	0.756422
2019-04-16	1.3	1.10524
2019-04-16 01:00:00	1.43	1.28421
2019-04-16 02:00:00	1.3	1.12719
2019-04-16 03:00:00	0.94	0.820951
2019-04-16 04:00:00	0.44	0.597416
2019-04-16 05:00:00	-0.08	0.264789
2019-04-16 06:00:00	-0.53	-0.192899
2019-04-16 07:00:00	-0.85	-0.630857
2019-04-16 08:00:00	-0.97	-0.857246
2019-04-16 09:00:00	-0.88	-0.47688
2019-04-16 10:00:00	-0.6	0.0774465
2019-04-16 11:00:00	-0.19	0.320475
2019-04-16 12:00:00	0.21	0.500137
2019-04-16 13:00:00	0.5	0.641501
2019-04-16 14:00:00	0.59	0.594845
2019-04-16 15:00:00	0.46	0.277243
2019-04-16 16:00:00	0.12	0.074493
2019-04-16 17:00:00	-0.32	-0.171503
2019-04-16 18:00:00	-0.73	-0.556954
2019-04-16 19:00:00	-0.98	-0.976104
2019-04-16 20:00:00	-1.01	-1.18391
2019-04-16 21:00:00	-0.78	-0.587298
2019-04-16 22:00:00	-0.32	0.0619176
2019-04-16 23:00:00	0.26	0.432805
2019-04-17	0.83	0.808491
2019-04-17 01:00:00	1.26	1.15201
2019-04-17 02:00:00	1.44	1.31197
2019-04-17 03:00:00	1.33	1.08792
2019-04-17 04:00:00	0.95	0.743255
2019-04-17 05:00:00	0.39	0.517462
2019-04-17 06:00:00	-0.18	0.170721
2019-04-17 07:00:00	-0.67	-0.313782
2019-04-17 08:00:00	-1	-0.768617
2019-04-17 09:00:00	-1.1	-0.959141
2019-04-17 10:00:00	-0.95	-0.33617
2019-04-17 11:00:00	-0.56	0.262018
2019-04-17 12:00:00	-0.04	0.531318
2019-04-17 13:00:00	0.46	0.786906
2019-04-17 14:00:00	0.8	0.961224
2019-04-17 15:00:00	0.89	0.8724
2019-04-17 16:00:00	0.71	0.480246
2019-04-17 17:00:00	0.28	0.257676
2019-04-17 18:00:00	-0.28	-0.0162158
2019-04-17 19:00:00	-0.77	-0.447993
2019-04-17 20:00:00	-1.08	-0.916175
2019-04-17 21:00:00	-1.15	-1.17273
2019-04-17 22:00:00	-0.93	-0.535176
2019-04-17 23:00:00	-0.44	0.184834
2019-04-18	0.19	0.559277
2019-04-18 01:00:00	0.8	0.92511
2019-04-18 02:00:00	1.24	1.23881
2019-04-18 03:00:00	1.42	1.3235
2019-04-18 04:00:00	1.28	0.964752
2019-04-18 05:00:00	0.83	0.643093
2019-04-18 06:00:00	0.21	0.407753
2019-04-18 07:00:00	-0.39	0.0175993
2019-04-18 08:00:00	-0.87	-0.497138
2019-04-18 09:00:00	-1.15	-0.939073
2019-04-18 10:00:00	-1.18	-0.961606
2019-04-18 11:00:00	-0.9	-0.11549
2019-04-18 12:00:00	-0.38	0.466866
2019-04-18 13:00:00	0.23	0.76868
2019-04-18 14:00:00	0.77	1.08023
2019-04-18 15:00:00	1.11	1.24226
2019-04-18 16:00:00	1.15	1.03851
2019-04-18 17:00:00	0.87	0.613473
2019-04-18 18:00:00	0.32	0.393245
2019-04-18 19:00:00	-0.32	0.0689346
2019-04-18 20:00:00	-0.85	-0.417656
2019-04-18 21:00:00	-1.18	-0.907396
2019-04-18 22:00:00	-1.24	-1.13544
2019-04-18 23:00:00	-0.98	-0.367036
2019-04-19	-0.45	0.351887
2019-04-19 01:00:00	0.21	0.701107
2019-04-19 02:00:00	0.81	1.05492
2019-04-19 03:00:00	1.22	1.30749
2019-04-19 04:00:00	1.34	1.26032
2019-04-19 05:00:00	1.12	0.795256
2019-04-19 06:00:00	0.59	0.532626
2019-04-19 07:00:00	-0.06	0.262454
2019-04-19 08:00:00	-0.65	-0.186165
2019-04-19 09:00:00	-1.07	-0.714307
2019-04-19 10:00:00	-1.26	-1.10104
2019-04-19 11:00:00	-1.16	-0.698933
2019-04-19 12:00:00	-0.73	0.187131
2019-04-19 13:00:00	-0.1	0.655409
2019-04-19 14:00:00	0.57	1.0112
2019-04-19 15:00:00	1.1	1.33793
2019-04-19 16:00:00	1.37	1.44106
2019-04-19 17:00:00	1.31	1.06902
2019-04-19 18:00:00	0.9	0.703226
2019-04-19 19:00:00	0.25	0.472503
2019-04-19 20:00:00	-0.41	0.0840716
2019-04-19 21:00:00	-0.94	-0.448018
2019-04-19 22:00:00	-1.24	-0.929183
2019-04-19 23:00:00	-1.25	-1.03253
2019-04-20	-0.93	-0.149668
2019-04-20 01:00:00	-0.37	0.512247
2019-04-20 02:00:00	0.29	0.826779
2019-04-20 03:00:00	0.85	1.14924
2019-04-20 04:00:00	1.18	1.30915
2019-04-20 05:00:00	1.21	1.07758
2019-04-20 06:00:00	0.88	0.623849
2019-04-20 07:00:00	0.28	0.399743
2019-04-20 08:00:00	-0.37	0.0690022
2019-04-20 09:00:00	-0.9	-0.431759
2019-04-20 10:00:00	-1.23	-0.941858
2019-04-20 11:00:00	-1.29	-1.1906
2019-04-20 12:00:00	-1.02	-0.347615
2019-04-20 13:00:00	-0.47	0.427322
2019-04-20 14:00:00	0.23	0.820301
2019-04-20 15:00:00	0.91	1.22514
2019-04-20 16:00:00	1.37	1.52385
2019-04-20 17:00:00	1.54	1.51343
2019-04-20 18:00:00	1.35	1.03144
2019-04-20 19:00:00	0.82	0.748371
2019-04-20 20:00:00	0.12	0.484249
2019-04-20 21:00:00	-0.53	0.0348977
2019-04-20 22:00:00	-1.01	-0.516279
2019-04-20 23:00:00	-1.26	-0.955868
2019-04-21	-1.2	-0.798158
2019-04-21 01:00:00	-0.82	0.112911
2019-04-21 02:00:00	-0.24	0.629054
2019-04-21 03:00:00	0.39	0.912731
2019-04-21 04:00:00	0.87	1.17375
2019-04-21 05:00:00	1.1	1.20967
2019-04-21 06:00:00	1.02	0.795001
2019-04-21 07:00:00	0.6	0.46352
2019-04-21 08:00:00	-0.04	0.23
2019-04-21 09:00:00	-0.65	-0.172995
2019-04-21 10:00:00	-1.1	-0.699621
2019-04-21 11:00:00	-1.31	-1.15155
2019-04-21 12:00:00	-1.22	-1.05883
2019-04-21 13:00:00	-0.8	-0.0987106
2019-04-21 14:00:00	-0.15	0.564511
2019-04-21 15:00:00	0.58	0.960937
2019-04-21 16:00:00	1.21	1.37549
2019-04-21 17:00:00	1.57	1.61838
2019-04-21 18:00:00	1.62	1.46123
2019-04-21 19:00:00	1.29	0.969856
2019-04-21 20:00:00	0.66	0.745654
2019-04-21 21:00:00	-0.03	0.431613
2019-04-21 22:00:00	-0.64	-0.0655777
2019-04-21 23:00:00	-1.06	-0.602961
2019-04-22	-1.24	-0.951747
2019-04-22 01:00:00	-1.1	-0.452486
2019-04-22 02:00:00	-0.68	0.35441
2019-04-22 03:00:00	-0.1	0.678583
2019-04-22 04:00:00	0.46	0.93236
2019-04-22 05:00:00	0.85	1.10659
2019-04-22 06:00:00	0.98	0.984684
2019-04-22 07:00:00	0.8	0.529909
2019-04-22 08:00:00	0.3	0.291726
2019-04-22 09:00:00	-0.33	0.00976572
2019-04-22 10:00:00	-0.88	-0.446996
2019-04-22 11:00:00	-1.23	-0.959136
2019-04-22 12:00:00	-1.31	-1.29545
2019-04-22 13:00:00	-1.07	-0.659434
2019-04-22 14:00:00	-0.53	0.183157
2019-04-22 15:00:00	0.18	0.63882
2019-04-22 16:00:00	0.89	1.06108
2019-04-22 17:00:00	1.44	1.44607
2019-04-22 18:00:00	1.69	1.60732
2019-04-22 19:00:00	1.6	1.30992
2019-04-22 20:00:00	1.16	0.91365
2019-04-22 21:00:00	0.5	0.693523
2019-04-22 22:00:00	-0.16	0.332933
2019-04-22 23:00:00	-0.71	-0.188158
2019-04-23	-1.08	-0.679136
2019-04-23 01:00:00	-1.18	-0.877371
2019-04-23 02:00:00	-0.99	-0.180285
2019-04-23 03:00:00	-0.55	0.436168
2019-04-23 04:00:00	0	0.661783
2019-04-23 05:00:00	0.49	0.868106
2019-04-23 06:00:00	0.79	0.939125
2019-04-23 07:00:00	0.82	0.664357
2019-04-23 08:00:00	0.56	0.302999
2019-04-23 09:00:00	0.03	0.0924752
2019-04-23 10:00:00	-0.56	-0.24433
2019-04-23 11:00:00	-1.04	-0.723454
2019-04-23 12:00:00	-1.28	-1.1779
2019-04-23 13:00:00	-1.23	-1.28092
2019-04-23 14:00:00	-0.87	-0.408851
2019-04-23 15:00:00	-0.25	0.279419
2019-04-23 16:00:00	0.47	0.671805
2019-04-23 17:00:00	1.14	1.10147
2019-04-23 18:00:00	1.58	1.43588
2019-04-23 19:00:00	1.73	1.50376
2019-04-23 20:00:00	1.52	1.13147
2019-04-23 21:00:00	1.01	0.844202
2019-04-23 22:00:00	0.37	0.612429
2019-04-23 23:00:00	-0.25	0.215136
2019-04-24	-0.75	-0.293905
2019-04-24 01:00:00	-1.05	-0.711191
2019-04-24 02:00:00	-1.1	-0.720689
2019-04-24 03:00:00	-0.87	-0.00101041
2019-04-24 04:00:00	-0.43	0.416413
2019-04-24 05:00:00	0.07	0.576852
2019-04-24 06:00:00	0.47	0.716205
2019-04-24 07:00:00	0.68	0.684311
2019-04-24 08:00:00	0.64	0.344259
2019-04-24 09:00:00	0.32	0.0983304
2019-04-24 10:00:00	-0.2	-0.124408
2019-04-24 11:00:00	-0.73	-0.499712
2019-04-24 12:00:00	-1.11	-0.962095
2019-04-24 13:00:00	-1.25	-1.31076
2019-04-24 14:00:00	-1.09	-1.02408
2019-04-24 15:00:00	-0.64	-0.21409
2019-04-24 16:00:00	0	0.28987
2019-04-24 17:00:00	0.69	0.67168
2019-04-24 18:00:00	1.28	1.0801
2019-04-24 19:00:00	1.63	1.36428
2019-04-24 20:00:00	1.68	1.35845
2019-04-24 21:00:00	1.39	0.996501
2019-04-24 22:00:00	0.87	0.779045
2019-04-24 23:00:00	0.27	0.529669
2019-04-25	-0.29	0.120336
2019-04-25 01:00:00	-0.73	-0.350019
2019-04-25 02:00:00	-0.97	-0.680163
2019-04-25 03:00:00	-0.98	-0.553069
2019-04-25 04:00:00	-0.74	0.0581822
2019-04-25 05:00:00	-0.35	0.309642
2019-04-25 06:00:00	0.08	0.417396
2019-04-25 07:00:00	0.4	0.483417
2019-04-25 08:00:00	0.53	0.375181
2019-04-25 09:00:00	0.44	0.0825232
2019-04-25 10:00:00	0.12	-0.094077
2019-04-25 11:00:00	-0.35	-0.335633
2019-04-25 12:00:00	-0.8	-0.714226
2019-04-25 13:00:00	-1.1	-1.11946
2019-04-25 14:00:00	-1.14	-1.30984
2019-04-25 15:00:00	-0.9	-0.737824
2019-04-25 16:00:00	-0.43	-0.1185
2019-04-25 17:00:00	0.19	0.253777
2019-04-25 18:00:00	0.81	0.635726
2019-04-25 19:00:00	1.31	1.0114
2019-04-25 20:00:00	1.57	1.25367
2019-04-25 21:00:00	1.54	1.22038
2019-04-25 22:00:00	1.24	0.929951
2019-04-25 23:00:00	0.75	0.739467
2019-04-26	0.21	0.482902
2019-04-26 01:00:00	-0.28	0.0845482
2019-04-26 02:00:00	-0.66	-0.337095
2019-04-26 03:00:00	-0.87	-0.601692
2019-04-26 04:00:00	-0.86	-0.472805
2019-04-26 05:00:00	-0.64	-0.0269458
2019-04-26 06:00:00	-0.31	0.134869
2019-04-26 07:00:00	0.04	0.185818
2019-04-26 08:00:00	0.29	0.18971
2019-04-26 09:00:00	0.38	0.071331
2019-04-26 10:00:00	0.29	-0.127978
2019-04-26 11:00:00	0	-0.263454
2019-04-26 12:00:00	-0.4	-0.497627
2019-04-26 13:00:00	-0.76	-0.838458
2019-04-26 14:00:00	-0.97	-1.1564
2019-04-26 15:00:00	-0.96	-1.17436
2019-04-26 16:00:00	-0.71	-0.588474
2019-04-26 17:00:00	-0.27	-0.129859
2019-04-26 18:00:00	0.28	0.198717
2019-04-26 19:00:00	0.81	0.569715
2019-04-26 20:00:00	1.22	0.921108
2019-04-26 21:00:00	1.42	1.1478
2019-04-26 22:00:00	1.36	1.13697
2019-04-26 23:00:00	1.08	0.921967
2019-04-27	0.66	0.74431
2019-04-27 01:00:00	0.2	0.491033
2019-04-27 02:00:00	-0.23	0.120829
2019-04-27 03:00:00	-0.57	-0.265535
2019-04-27 04:00:00	-0.76	-0.520744
2019-04-27 05:00:00	-0.76	-0.503363
2019-04-27 06:00:00	-0.59	-0.218305
2019-04-27 07:00:00	-0.33	-0.0882509
2019-04-27 08:00:00	-0.04	-0.0783881
2019-04-27 09:00:00	0.18	-0.110131
2019-04-27 10:00:00	0.27	-0.177056
2019-04-27 11:00:00	0.21	-0.283514
2019-04-27 12:00:00	-0.02	-0.373935
2019-04-27 13:00:00	-0.33	-0.552002
2019-04-27 14:00:00	-0.62	-0.816693
2019-04-27 15:00:00	-0.78	-1.04999
2019-04-27 16:00:00	-0.77	-0.993795
2019-04-27 17:00:00	-0.56	-0.525832
2019-04-27 18:00:00	-0.18	-0.168341
2019-04-27 19:00:00	0.27	0.142303
2019-04-27 20:00:00	0.71	0.495784
2019-04-27 21:00:00	1.06	0.838855
2019-04-27 22:00:00	1.23	1.07625
2019-04-27 23:00:00	1.19	1.11837
2019-04-28	0.96	0.95726
2019-04-28 01:00:00	0.61	0.77859
2019-04-28 02:00:00	0.21	0.535708
2019-04-28 03:00:00	-0.18	0.192733
2019-04-28 04:00:00	-0.5	-0.184022
2019-04-28 05:00:00	-0.69	-0.475546
2019-04-28 06:00:00	-0.72	-0.580854
2019-04-28 07:00:00	-0.61	-0.456812
2019-04-28 08:00:00	-0.39	-0.29148
2019-04-28 09:00:00	-0.12	-0.252684
2019-04-28 10:00:00	0.1	-0.270319
2019-04-28 11:00:00	0.24	-0.280153
2019-04-28 12:00:00	0.23	-0.302011
2019-04-28 13:00:00	0.08	-0.35747
2019-04-28 14:00:00	-0.16	-0.447545
2019-04-28 15:00:00	-0.41	-0.613955
2019-04-28 16:00:00	-0.58	-0.801251
2019-04-28 17:00:00	-0.61	-0.822465
2019-04-28 18:00:00	-0.48	-0.496824
2019-04-28 19:00:00	-0.2	-0.173336
2019-04-28 20:00:00	0.17	0.111282
2019-04-28 21:00:00	0.56	0.436618
2019-04-28 22:00:00	0.88	0.771508
2019-04-28 23:00:00	1.06	1.03277
2019-04-29	1.06	1.12063
2019-04-29 01:00:00	0.9	0.986787
2019-04-29 02:00:00	0.6	0.789452
2019-04-29 03:00:00	0.23	0.549165
2019-04-29 04:00:00	-0.16	0.217075
2019-04-29 05:00:00	-0.49	-0.169195
2019-04-29 06:00:00	-0.7	-0.502199
2019-04-29 07:00:00	-0.76	-0.674938
2019-04-29 08:00:00	-0.67	-0.602328
2019-04-29 09:00:00	-0.45	-0.356574
2019-04-29 10:00:00	-0.16	-0.236404
2019-04-29 11:00:00	0.13	-0.191681
2019-04-29 12:00:00	0.32	-0.131192
2019-04-29 13:00:00	0.37	-0.0819055
2019-04-29 14:00:00	0.27	-0.140651
2019-04-29 15:00:00	0.05	-0.225497
2019-04-29 16:00:00	-0.22	-0.348349
2019-04-29 17:00:00	-0.45	-0.527199
2019-04-29 18:00:00	-0.55	-0.668491
2019-04-29 19:00:00	-0.49	-0.524859
2019-04-29 20:00:00	-0.29	-0.156088
2019-04-29 21:00:00	0.03	0.123194
2019-04-29 22:00:00	0.41	0.400196
2019-04-29 23:00:00	0.75	0.705756
2019-04-30	0.96	0.975957
2019-04-30 01:00:00	1.01	1.08339
2019-04-30 02:00:00	0.88	0.941916
2019-04-30 03:00:00	0.59	0.717192
2019-04-30 04:00:00	0.2	0.475149
2019-04-30 05:00:00	-0.2	0.135656
2019-04-30 06:00:00	-0.55	-0.270405
2019-04-30 07:00:00	-0.78	-0.622474
2019-04-30 08:00:00	-0.84	-0.789784
2019-04-30 09:00:00	-0.73	-0.601634
2019-04-30 10:00:00	-0.45	-0.248122
2019-04-30 11:00:00	-0.09	-0.0704219
2019-04-30 12:00:00	0.26	0.0443943
2019-04-30 13:00:00	0.51	0.172527
2019-04-30 14:00:00	0.59	0.243018
2019-04-30 15:00:00	0.48	0.124038
2019-04-30 16:00:00	0.22	-0.0128289
2019-04-30 17:00:00	-0.12	-0.167592
2019-04-30 18:00:00	-0.42	-0.397279
2019-04-30 19:00:00	-0.59	-0.632207
2019-04-30 20:00:00	-0.59	-0.618445
2019-04-30 21:00:00	-0.41	-0.165755
2019-04-30 22:00:00	-0.08	0.174196
2019-04-30 23:00:00	0.32	0.424736
2019-05-01	0.7	0.704937
		0.94758
		1.02003
		0.800462
		0.569392
		0.322871
		-0.042589
		-0.469538

## Sheet: tanggu
2019-04-01	0.81	1.15137
2019-04-01 01:00:00	0.83	1.15865
2019-04-01 02:00:00	0.68	0.896288
2019-04-01 03:00:00	0.42	0.377828
2019-04-01 04:00:00	0.14	-0.0783595
2019-04-01 05:00:00	-0.12	-0.403186
2019-04-01 06:00:00	-0.31	-0.60832
2019-04-01 07:00:00	-0.36	-0.71671
2019-04-01 08:00:00	-0.25	-0.647608
2019-04-01 09:00:00	-0.02	-0.303416
2019-04-01 10:00:00	0.26	0.133135
2019-04-01 11:00:00	0.47	0.445762
2019-04-01 12:00:00	0.58	0.539171
2019-04-01 13:00:00	0.54	0.405949
2019-04-01 14:00:00	0.33	0.0803916
2019-04-01 15:00:00	-0.01	-0.262921
2019-04-01 16:00:00	-0.41	-0.560022
2019-04-01 17:00:00	-0.81	-0.840588
2019-04-01 18:00:00	-1.11	-1.05957
2019-04-01 19:00:00	-1.25	-1.12802
2019-04-01 20:00:00	-1.18	-0.779848
2019-04-01 21:00:00	-0.84	-0.0867155
2019-04-01 22:00:00	-0.32	0.449315
2019-04-01 23:00:00	0.24	0.839032
2019-04-02	0.7	1.08834
2019-04-02 01:00:00	0.95	1.21304
2019-04-02 02:00:00	0.95	1.16029
2019-04-02 03:00:00	0.75	0.811522
2019-04-02 04:00:00	0.44	0.239898
2019-04-02 05:00:00	0.08	-0.214558
2019-04-02 06:00:00	-0.26	-0.541416
2019-04-02 07:00:00	-0.52	-0.750814
2019-04-02 08:00:00	-0.59	-0.858528
2019-04-02 09:00:00	-0.45	-0.690763
2019-04-02 10:00:00	-0.12	-0.163084
2019-04-02 11:00:00	0.26	0.332612
2019-04-02 12:00:00	0.57	0.630992
2019-04-02 13:00:00	0.73	0.702216
2019-04-02 14:00:00	0.71	0.553709
2019-04-02 15:00:00	0.48	0.185825
2019-04-02 16:00:00	0.09	-0.201424
2019-04-02 17:00:00	-0.37	-0.5406
2019-04-02 18:00:00	-0.82	-0.851454
2019-04-02 19:00:00	-1.17	-1.07474
2019-04-02 20:00:00	-1.34	-1.13021
2019-04-02 21:00:00	-1.24	-0.674375
2019-04-02 22:00:00	-0.81	0.0825134
2019-04-02 23:00:00	-0.2	0.601818
2019-04-03	0.42	0.97143
2019-04-03 01:00:00	0.89	1.19301
2019-04-03 02:00:00	1.09	1.24133
2019-04-03 03:00:00	1.01	1.06622
2019-04-03 04:00:00	0.72	0.575266
2019-04-03 05:00:00	0.34	-0.00205601
2019-04-03 06:00:00	-0.1	-0.408815
2019-04-03 07:00:00	-0.51	-0.712564
2019-04-03 08:00:00	-0.79	-0.913105
2019-04-03 09:00:00	-0.82	-0.94766
2019-04-03 10:00:00	-0.56	-0.514955
2019-04-03 11:00:00	-0.1	0.158741
2019-04-03 12:00:00	0.38	0.600026
2019-04-03 13:00:00	0.74	0.837344
2019-04-03 14:00:00	0.91	0.85756
2019-04-03 15:00:00	0.83	0.619039
2019-04-03 16:00:00	0.54	0.189534
2019-04-03 17:00:00	0.09	-0.232337
2019-04-03 18:00:00	-0.42	-0.613457
2019-04-03 19:00:00	-0.91	-0.911822
2019-04-03 20:00:00	-1.27	-1.13066
2019-04-03 21:00:00	-1.4	-1.08933
2019-04-03 22:00:00	-1.18	-0.433602
2019-04-03 23:00:00	-0.63	0.314584
2019-04-04	0.05	0.797593
2019-04-04 01:00:00	0.67	1.10394
2019-04-04 02:00:00	1.08	1.26856
2019-04-04 03:00:00	1.16	1.18893
2019-04-04 04:00:00	0.95	0.828983
2019-04-04 05:00:00	0.58	0.247013
2019-04-04 06:00:00	0.12	-0.260594
2019-04-04 07:00:00	-0.37	-0.623536
2019-04-04 08:00:00	-0.8	-0.894588
2019-04-04 09:00:00	-1.04	-1.0601
2019-04-04 10:00:00	-0.94	-0.850254
2019-04-04 11:00:00	-0.53	-0.104777
2019-04-04 12:00:00	0.05	0.491112
2019-04-04 13:00:00	0.58	0.872939
2019-04-04 14:00:00	0.93	1.01714
2019-04-04 15:00:00	1.03	0.954157
2019-04-04 16:00:00	0.86	0.595844
2019-04-04 17:00:00	0.49	0.104219
2019-04-04 18:00:00	0	-0.343513
2019-04-04 19:00:00	-0.54	-0.719256
2019-04-04 20:00:00	-1.03	-1.00063
2019-04-04 21:00:00	-1.35	-1.17546
2019-04-04 22:00:00	-1.36	-0.906917
2019-04-04 23:00:00	-0.97	-0.0596006
2019-04-05	-0.32	0.565201
2019-04-05 01:00:00	0.37	1.00355
2019-04-05 02:00:00	0.93	1.228
2019-04-05 03:00:00	1.19	1.26334
2019-04-05 04:00:00	1.11	1.01529
2019-04-05 05:00:00	0.79	0.487273
2019-04-05 06:00:00	0.35	-0.0840368
2019-04-05 07:00:00	-0.17	-0.509402
2019-04-05 08:00:00	-0.68	-0.834559
2019-04-05 09:00:00	-1.08	-1.07848
2019-04-05 10:00:00	-1.2	-1.11009
2019-04-05 11:00:00	-0.92	-0.471572
2019-04-05 12:00:00	-0.36	0.327872
2019-04-05 13:00:00	0.28	0.808679
2019-04-05 14:00:00	0.8	1.08716
2019-04-05 15:00:00	1.07	1.18027
2019-04-05 16:00:00	1.06	0.964268
2019-04-05 17:00:00	0.79	0.492715
2019-04-05 18:00:00	0.36	-0.0329728
2019-04-05 19:00:00	-0.16	-0.483672
2019-04-05 20:00:00	-0.7	-0.817552
2019-04-05 21:00:00	-1.15	-1.08923
2019-04-05 22:00:00	-1.36	-1.16441
2019-04-05 23:00:00	-1.19	-0.563912
2019-04-06	-0.65	0.293105
2019-04-06 01:00:00	0.05	0.807907
2019-04-06 02:00:00	0.69	1.14088
2019-04-06 03:00:00	1.1	1.2898
2019-04-06 04:00:00	1.18	1.13912
2019-04-06 05:00:00	0.96	0.699031
2019-04-06 06:00:00	0.55	0.124883
2019-04-06 07:00:00	0.06	-0.371108
2019-04-06 08:00:00	-0.48	-0.739229
2019-04-06 09:00:00	-0.96	-1.04292
2019-04-06 10:00:00	-1.27	-1.22212
2019-04-06 11:00:00	-1.22	-0.866382
2019-04-06 12:00:00	-0.76	0.0580151
2019-04-06 13:00:00	-0.1	0.662328
2019-04-06 14:00:00	0.54	1.09071
2019-04-06 15:00:00	0.99	1.28576
2019-04-06 16:00:00	1.14	1.24651
2019-04-06 17:00:00	0.99	0.902866
2019-04-06 18:00:00	0.64	0.337234
2019-04-06 19:00:00	0.18	-0.1997
2019-04-06 20:00:00	-0.35	-0.599989
2019-04-06 21:00:00	-0.86	-0.918734
2019-04-06 22:00:00	-1.23	-1.14056
2019-04-06 23:00:00	-1.28	-0.998603
2019-04-07	-0.9	-0.15183
2019-04-07 01:00:00	-0.25	0.551934
2019-04-07 02:00:00	0.43	1.01194
2019-04-07 03:00:00	0.95	1.22086
2019-04-07 04:00:00	1.17	1.22243
2019-04-07 05:00:00	1.06	0.880856
2019-04-07 06:00:00	0.72	0.330271
2019-04-07 07:00:00	0.26	-0.198434
2019-04-07 08:00:00	-0.27	-0.626394
2019-04-07 09:00:00	-0.78	-0.956674
2019-04-07 10:00:00	-1.2	-1.22675
2019-04-07 11:00:00	-1.37	-1.22748
2019-04-07 12:00:00	-1.1	-0.430433
2019-04-07 13:00:00	-0.49	0.416694
2019-04-07 14:00:00	0.21	0.948154
2019-04-07 15:00:00	0.8	1.25965
2019-04-07 16:00:00	1.13	1.40882
2019-04-07 17:00:00	1.14	1.2376
2019-04-07 18:00:00	0.87	0.757212
2019-04-07 19:00:00	0.46	0.153499
2019-04-07 20:00:00	-0.02	-0.335581
2019-04-07 21:00:00	-0.53	-0.697508
2019-04-07 22:00:00	-0.98	-0.988006
2019-04-07 23:00:00	-1.22	-1.13346
2019-04-08	-1.07	-0.649471
2019-04-08 01:00:00	-0.52	0.243479
2019-04-08 02:00:00	0.16	0.77378
2019-04-08 03:00:00	0.75	1.11991
2019-04-08 04:00:00	1.1	1.2314
2019-04-08 05:00:00	1.12	1.02609
2019-04-08 06:00:00	0.86	0.53939
2019-04-08 07:00:00	0.43	-0.000359839
2019-04-08 08:00:00	-0.07	-0.474588
2019-04-08 09:00:00	-0.6	-0.841564
2019-04-08 10:00:00	-1.07	-1.16423
2019-04-08 11:00:00	-1.38	-1.35517
2019-04-08 12:00:00	-1.35	-0.926558
2019-04-08 13:00:00	-0.88	0.0752521
2019-04-08 14:00:00	-0.18	0.697493
2019-04-08 15:00:00	0.52	1.16558
2019-04-08 16:00:00	1.03	1.42208
2019-04-08 17:00:00	1.22	1.44564
2019-04-08 18:00:00	1.09	1.18474
2019-04-08 19:00:00	0.73	0.598355
2019-04-08 20:00:00	0.28	-0.00678133
2019-04-08 21:00:00	-0.21	-0.433165
2019-04-08 22:00:00	-0.68	-0.772678
2019-04-08 23:00:00	-1.04	-1.01576
2019-04-09	-1.11	-1.01297
2019-04-09 01:00:00	-0.75	-0.308413
2019-04-09 02:00:00	-0.11	0.457872
2019-04-09 03:00:00	0.54	0.91077
2019-04-09 04:00:00	0.99	1.11735
2019-04-09 05:00:00	1.15	1.10617
2019-04-09 06:00:00	0.98	0.724339
2019-04-09 07:00:00	0.59	0.19299
2019-04-09 08:00:00	0.11	-0.280772
2019-04-09 09:00:00	-0.42	-0.706358
2019-04-09 10:00:00	-0.76	-1.03921
2019-04-09 11:00:00	-1.21	-1.32946
2019-04-09 12:00:00	-1.5	-1.35998
2019-04-09 13:00:00	-1.5	-0.573316
2019-04-09 14:00:00	-1.08	0.326017
2019-04-09 15:00:00	-0.36	0.889878
2019-04-09 16:00:00	0.4	1.25419
2019-04-09 17:00:00	0	1.48151
2019-04-09 18:00:00	0.29	1.4267
2019-04-09 19:00:00	1.24	1.06565
2019-04-09 20:00:00	0.91	0.431173
2019-04-09 21:00:00	0.47	-0.114606
2019-04-09 22:00:00	0.01	-0.504148
2019-04-09 23:00:00	-0.42	-0.799574
2019-04-10	-1.01	-0.989899
2019-04-10 01:00:00	-0.89	-0.779484
2019-04-10 02:00:00	-0.39	-0.00188807
2019-04-10 03:00:00	0.28	0.589787
2019-04-10 04:00:00	0.84	0.95574
2019-04-10 05:00:00	1.14	1.04788
2019-04-10 06:00:00	0.98	0.876966
2019-04-10 07:00:00	0.59	0.400054
2019-04-10 08:00:00	0.11	-0.0908201
2019-04-10 09:00:00	-0.42	-0.517489
2019-04-10 10:00:00	-0.93	-0.894179
2019-04-10 11:00:00	-1.32	-1.21073
2019-04-10 12:00:00	-1.48	-1.43296
2019-04-10 13:00:00	-1.24	-1.17263
2019-04-10 14:00:00	-0.61	-0.212296
2019-04-10 15:00:00	0.14	0.489683
2019-04-10 16:00:00	0.8	1.00517
2019-04-10 17:00:00	1.21	1.31272
2019-04-10 18:00:00	1.26	1.46916
2019-04-10 19:00:00	1.01	1.39325
2019-04-10 20:00:00	0.59	0.966948
2019-04-10 21:00:00	0.12	0.312102
2019-04-10 22:00:00	-0.35	-0.171241
2019-04-10 23:00:00	-1.06	-0.532906
2019-04-11	-0.75	-0.780229
2019-04-11 01:00:00	-0.86	-0.895931
2019-04-11 02:00:00	-0.59	-0.561383
2019-04-11 03:00:00	-0.02	0.151307
2019-04-11 04:00:00	0.6	0.627778
2019-04-11 05:00:00	1.04	0.897019
2019-04-11 06:00:00	1.17	0.899868
2019-04-11 07:00:00	0.98	0.606632
2019-04-11 08:00:00	0.56	0.123331
2019-04-11 09:00:00	0.04	-0.302794
2019-04-11 10:00:00	-0.51	-0.694427
2019-04-11 11:00:00	-1.02	-1.03289
2019-04-11 12:00:00	-1.41	-1.32737
2019-04-11 13:00:00	-1.58	-1.45866
2019-04-11 14:00:00	-1.44	-0.956431
2019-04-11 15:00:00	-0.91	-0.0238187
2019-04-11 16:00:00	-0.17	0.563075
2019-04-11 17:00:00	0.55	1.00664
2019-04-11 18:00:00	1.08	1.29926
2019-04-11 19:00:00	1.28	1.42044
2019-04-11 20:00:00	1.16	1.35112
2019-04-11 21:00:00	0.82	0.911003
2019-04-11 22:00:00	0.39	0.277658
2019-04-11 23:00:00	-0.03	-0.17296
2019-04-12	-0.4	-0.508754
2019-04-12 01:00:00	-0.65	-0.714443
2019-04-12 02:00:00	-0.64	-0.778138
2019-04-12 03:00:00	-0.3	-0.451098
2019-04-12 04:00:00	0.26	0.146756
2019-04-12 05:00:00	0.79	0.563509
2019-04-12 06:00:00	1.1	0.768737
2019-04-12 07:00:00	1.11	0.714577
2019-04-12 08:00:00	0.83	0.378666
2019-04-12 09:00:00	0.36	-0.0709988
2019-04-12 10:00:00	-0.16	-0.442984
2019-04-12 11:00:00	-0.68	-0.79653
2019-04-12 12:00:00	-1.15	-1.11173
2019-04-12 13:00:00	-1.47	-1.37052
2019-04-12 14:00:00	-1.57	-1.42616
2019-04-12 15:00:00	-1.34	-0.855702
2019-04-12 16:00:00	-0.79	-0.00264517
2019-04-12 17:00:00	-0.09	0.538333
2019-04-12 18:00:00	0.57	0.939427
2019-04-12 19:00:00	1.02	1.22485
2019-04-12 20:00:00	1.19	1.35859
2019-04-12 21:00:00	1.07	1.32515
2019-04-12 22:00:00	0.76	0.934608
2019-04-12 23:00:00	0.39	0.329635
2019-04-13	0.02	-0.117623
2019-04-13 01:00:00	-0.3	-0.438797
2019-04-13 02:00:00	-0.48	-0.63072
2019-04-13 03:00:00	-0.42	-0.694555
2019-04-13 04:00:00	-0.09	-0.472855
2019-04-13 05:00:00	0.39	0.00810948
2019-04-13 06:00:00	0.82	0.412237
2019-04-13 07:00:00	0.04	0.619992
2019-04-13 08:00:00	0.98	0.578056
2019-04-13 09:00:00	0.69	0.275522
2019-04-13 10:00:00	0.26	-0.140059
2019-04-13 11:00:00	-0.23	-0.48104
2019-04-13 12:00:00	-0.71	-0.801254
2019-04-13 13:00:00	-1.12	-1.1023
2019-04-13 14:00:00	-1.4	-1.34009
2019-04-13 15:00:00	-1.48	-1.39229
2019-04-13 16:00:00	-1.26	-0.900502
2019-04-13 17:00:00	-0.77	-0.0986579
2019-04-13 18:00:00	-0.15	0.438706
2019-04-13 19:00:00	0.45	0.842596
2019-04-13 20:00:00	0.88	1.13083
2019-04-13 21:00:00	1.06	1.30136
2019-04-13 22:00:00	1	1.32751
2019-04-13 23:00:00	0.77	1.0367
2019-04-14	0.47	0.457153
2019-04-14 01:00:00	0.14	-0.019903
2019-04-14 02:00:00	-0.14	-0.362119
2019-04-14 03:00:00	-0.32	-0.575146
2019-04-14 04:00:00	-0.29	-0.686579
2019-04-14 05:00:00	-0.05	-0.598147
2019-04-14 06:00:00	0.34	-0.220222
2019-04-14 07:00:00	0.69	0.217549
2019-04-14 08:00:00	0.88	0.507317
2019-04-14 09:00:00	0.85	0.563537
2019-04-14 10:00:00	0.62	0.363707
2019-04-14 11:00:00	0.27	-0.0233189
2019-04-14 12:00:00	-0.14	-0.376171
2019-04-14 13:00:00	-0.57	-0.684202
2019-04-14 14:00:00	-0.96	-0.98536
2019-04-14 15:00:00	-1.26	-1.23977
2019-04-14 16:00:00	-1.37	-1.36421
2019-04-14 17:00:00	-1.23	-1.08219
2019-04-14 18:00:00	-0.85	-0.324692
2019-04-14 19:00:00	-0.31	0.290197
2019-04-14 20:00:00	0.25	0.740332
2019-04-14 21:00:00	0.7	1.05144
2019-04-14 22:00:00	0.96	1.26942
2019-04-14 23:00:00	1	1.33996
2019-04-15	0.85	1.15095
2019-04-15 01:00:00	0.6	0.604928
2019-04-15 02:00:00	0.29	0.0651319
2019-04-15 03:00:00	-0.02	-0.322841
2019-04-15 04:00:00	-0.24	-0.583421
2019-04-15 05:00:00	-0.3	-0.753242
2019-04-15 06:00:00	-0.17	-0.764332
2019-04-15 07:00:00	0.13	-0.44374
2019-04-15 08:00:00	0.45	0.0827772
2019-04-15 09:00:00	0.69	0.487242
2019-04-15 10:00:00	0.76	0.667019
2019-04-15 11:00:00	0.66	0.603604
2019-04-15 12:00:00	0.41	0.285965
2019-04-15 13:00:00	0.07	-0.122651
2019-04-15 14:00:00	-0.33	-0.466446
2019-04-15 15:00:00	-0.74	-0.796895
2019-04-15 16:00:00	-1.09	-1.09124
2019-04-15 17:00:00	-1.3	-1.30076
2019-04-15 18:00:00	-1.28	-1.25104
2019-04-15 19:00:00	-1	-0.604278
2019-04-15 20:00:00	-0.51	0.157988
2019-04-15 21:00:00	0.07	0.665572
2019-04-15 22:00:00	0.59	1.02918
2019-04-15 23:00:00	0.95	1.28713
2019-04-16	1.07	1.36372
2019-04-16 01:00:00	0.98	1.20778
2019-04-16 02:00:00	0.72	0.679469
2019-04-16 03:00:00	0.38	0.0778526
2019-04-16 04:00:00	0.03	-0.343656
2019-04-16 05:00:00	-0.29	-0.653014
2019-04-16 06:00:00	-0.47	-0.867419
2019-04-16 07:00:00	-0.43	-0.931448
2019-04-16 08:00:00	-0.17	-0.567506
2019-04-16 09:00:00	0.21	0.104367
2019-04-16 10:00:00	0.56	0.582138
2019-04-16 11:00:00	0.77	0.845242
2019-04-16 12:00:00	0.79	0.873079
2019-04-16 13:00:00	0.63	0.627566
2019-04-16 14:00:00	0.33	0.178108
2019-04-16 15:00:00	-0.08	-0.247351
2019-04-16 16:00:00	-0.53	-0.635291
2019-04-16 17:00:00	-0.96	-0.9664
2019-04-16 18:00:00	-1.27	-1.23211
2019-04-16 19:00:00	-1.37	-1.31264
2019-04-16 20:00:00	-1.16	-0.765402
2019-04-16 21:00:00	-0.66	0.111359
2019-04-16 22:00:00	-0.01	0.667705
2019-04-16 23:00:00	0.59	1.07991
2019-04-17	1.02	1.34152
2019-04-17 01:00:00	1.18	1.38926
2019-04-17 02:00:00	1.08	1.18106
2019-04-17 03:00:00	0.78	0.614281
2019-04-17 04:00:00	0.38	-0.00064181
2019-04-17 05:00:00	-0.06	-0.429301
2019-04-17 06:00:00	-0.46	-0.762815
2019-04-17 07:00:00	-0.74	-1.0045
2019-04-17 08:00:00	-0.75	-1.06945
2019-04-17 09:00:00	-0.45	-0.523466
2019-04-17 10:00:00	0.04	0.276146
2019-04-17 11:00:00	0.52	0.76838
2019-04-17 12:00:00	0.86	1.05563
2019-04-17 13:00:00	0.98	1.13264
2019-04-17 14:00:00	0.86	0.890034
2019-04-17 15:00:00	0.55	0.400586
2019-04-17 16:00:00	0.11	-0.102716
2019-04-17 17:00:00	-0.39	-0.547855
2019-04-17 18:00:00	-0.9	-0.895334
2019-04-17 19:00:00	-1.29	-1.19467
2019-04-17 20:00:00	-1.45	-1.32475
2019-04-17 21:00:00	-1.25	-0.773414
2019-04-17 22:00:00	-0.68	0.173244
2019-04-17 23:00:00	0.04	0.746701
2019-04-18	0.69	1.16702
2019-04-18 01:00:00	1.13	1.40652
2019-04-18 02:00:00	1.25	1.37935
2019-04-18 03:00:00	1.09	1.04933
2019-04-18 04:00:00	0.72	0.43321
2019-04-18 05:00:00	0.26	-0.14649
2019-04-18 06:00:00	-0.25	-0.564304
2019-04-18 07:00:00	-0.72	-0.901704
2019-04-18 08:00:00	-1.05	-1.15355
2019-04-18 09:00:00	-1.04	-1.12281
2019-04-18 10:00:00	-0.64	-0.316156
2019-04-18 11:00:00	-0.01	0.490676
2019-04-18 12:00:00	0.58	1.00181
2019-04-18 13:00:00	1	1.26788
2019-04-18 14:00:00	1.15	1.34429
2019-04-18 15:00:00	1.01	1.05484
2019-04-18 16:00:00	0.68	0.500088
2019-04-18 17:00:00	0.21	-0.0581464
2019-04-18 18:00:00	-0.33	-0.517739
2019-04-18 19:00:00	-0.88	-0.873137
2019-04-18 20:00:00	-1.32	-1.17974
2019-04-18 21:00:00	-1.48	-1.30669
2019-04-18 22:00:00	-1.2	-0.643368
2019-04-18 23:00:00	-0.55	0.314382
2019-04-19	0.2	0.875772
2019-04-19 01:00:00	0.85	1.25161
2019-04-19 02:00:00	1.23	1.44223
2019-04-19 03:00:00	1.25	1.28827
2019-04-19 04:00:00	0.98	0.809033
2019-04-19 05:00:00	0.55	0.194689
2019-04-19 06:00:00	0.05	-0.329017
2019-04-19 07:00:00	-0.51	-0.724429
2019-04-19 08:00:00	-1.01	-1.06222
2019-04-19 09:00:00	-1.32	-1.2946
2019-04-19 10:00:00	-1.22	-0.972104
2019-04-19 11:00:00	-0.68	0.0639907
2019-04-19 12:00:00	0.05	0.737303
2019-04-19 13:00:00	0.71	1.24207
2019-04-19 14:00:00	1.15	1.48882
2019-04-19 15:00:00	1.26	1.48523
2019-04-19 16:00:00	1.08	1.13317
2019-04-19 17:00:00	0.71	0.509248
2019-04-19 18:00:00	0.23	-0.0836438
2019-04-19 19:00:00	-0.33	-0.521495
2019-04-19 20:00:00	-0.89	-0.884124
2019-04-19 21:00:00	-1.32	-1.17811
2019-04-19 22:00:00	-1.41	-1.22963
2019-04-19 23:00:00	-1.01	-0.423229
2019-04-20	-0.29	0.477828
2019-04-20 01:00:00	0.44	1.01916
2019-04-20 02:00:00	1.01	1.3079
2019-04-20 03:00:00	1.26	1.399
2019-04-20 04:00:00	0.15	1.08375
2019-04-20 05:00:00	0.79	0.508098
2019-04-20 06:00:00	0.31	-0.0558853
2019-04-20 07:00:00	-0.23	-0.530238
2019-04-20 08:00:00	-0.8	-0.898012
2019-04-20 09:00:00	-1.29	-1.22818
2019-04-20 10:00:00	-1.52	-1.38503
2019-04-20 11:00:00	-1.26	-0.673118
2019-04-20 12:00:00	-0.59	0.355403
2019-04-20 13:00:00	0.2	0.963023
2019-04-20 14:00:00	0.86	1.3869
2019-04-20 15:00:00	1.26	1.6378
2019-04-20 16:00:00	1.29	1.53716
2019-04-20 17:00:00	1.06	1.09125
2019-04-20 18:00:00	0.66	0.42847
2019-04-20 19:00:00	0.18	-0.136188
2019-04-20 20:00:00	-0.37	-0.556843
2019-04-20 21:00:00	-0.9	-0.906488
2019-04-20 22:00:00	-1.27	-1.1744
2019-04-20 23:00:00	-1.23	-1.04161
2019-04-21	-0.71	-0.095514
2019-04-21 01:00:00	0.02	0.652138
2019-04-21 02:00:00	0.68	1.13511
2019-04-21 03:00:00	1.13	1.31868
2019-04-21 04:00:00	1.21	1.24909
2019-04-21 05:00:00	0.97	0.784061
2019-04-21 06:00:00	0.54	0.203846
2019-04-21 07:00:00	0.03	-0.305116
2019-04-21 08:00:00	-0.53	-0.731244
2019-04-21 09:00:00	-1.08	-1.08369
2019-04-21 10:00:00	-1.51	-1.38138
2019-04-21 11:00:00	-1.61	-1.31514
2019-04-21 12:00:00	-1.18	-0.315648
2019-04-21 13:00:00	-0.42	0.558437
2019-04-21 14:00:00	0.38	1.15943
2019-04-21 15:00:00	1.01	1.50409
2019-04-21 16:00:00	1.32	1.67851
2019-04-21 17:00:00	1.27	1.51602
2019-04-21 18:00:00	0.98	0.979902
2019-04-21 19:00:00	0.58	0.291841
2019-04-21 20:00:00	0.1	-0.216323
2019-04-21 21:00:00	-0.44	-0.608328
2019-04-21 22:00:00	-0.92	-0.929336
2019-04-21 23:00:00	-1.16	-1.13361
2019-04-22	-0.96	-0.734476
2019-04-22 01:00:00	-0.35	0.221282
2019-04-22 02:00:00	0.34	0.791833
2019-04-22 03:00:00	0.89	1.15931
2019-04-22 04:00:00	1.17	1.24574
2019-04-22 05:00:00	1.09	0.9832
2019-04-22 06:00:00	0.76	0.444488
2019-04-22 07:00:00	0.28	-0.0767028
2019-04-22 08:00:00	-0.26	-0.542119
2019-04-22 09:00:00	-0.83	-0.918377
2019-04-22 10:00:00	-1.34	-1.26484
2019-04-22 11:00:00	-1.67	-1.48392
2019-04-22 12:00:00	-1.59	-0.991141
2019-04-22 13:00:00	-1.02	0.0963499
2019-04-22 14:00:00	-0.2	0.745471
2019-04-22 15:00:00	0.58	1.26331
2019-04-22 16:00:00	1.14	1.57896
2019-04-22 17:00:00	1.35	1.64542
2019-04-22 18:00:00	1.21	1.42992
2019-04-22 19:00:00	0.88	0.81976
2019-04-22 20:00:00	0.47	0.161159
2019-04-22 21:00:00	-0.01	-0.296758
2019-04-22 22:00:00	-0.51	-0.662112
2019-04-22 23:00:00	-0.91	-0.932903
2019-04-23	-0.99	-1.0251
2019-04-23 01:00:00	-0.63	-0.439309
2019-04-23 02:00:00	0	0.386687
2019-04-23 03:00:00	0.62	0.856165
2019-04-23 04:00:00	1.04	1.07789
2019-04-23 05:00:00	1.15	1.05135
2019-04-23 06:00:00	0.95	0.637843
2019-04-23 07:00:00	0.54	0.111768
2019-04-23 08:00:00	0.02	-0.331488
2019-04-23 09:00:00	-0.56	-0.753131
2019-04-23 10:00:00	-1.11	-1.0964
2019-04-23 11:00:00	-1.54	-1.4075
2019-04-23 12:00:00	-1.73	-1.46712
2019-04-23 13:00:00	-1.47	-0.682756
2019-04-23 14:00:00	-0.79	0.268186
2019-04-23 15:00:00	0.03	0.863544
2019-04-23 16:00:00	0.76	1.26673
2019-04-23 17:00:00	1.23	1.54367
2019-04-23 18:00:00	1.33	1.54926
2019-04-23 19:00:00	1.13	1.26901
2019-04-23 20:00:00	0.77	0.630326
2019-04-23 21:00:00	0.34	0.039553
2019-04-23 22:00:00	-0.13	-0.372844
2019-04-23 23:00:00	-0.57	-0.682374
2019-04-24	-0.84	-0.898068
2019-04-24 01:00:00	-0.75	-0.825498
2019-04-24 02:00:00	-0.3	-0.177205
2019-04-24 03:00:00	0.32	0.462371
2019-04-24 04:00:00	0.82	0.830174
2019-04-24 05:00:00	1.1	0.926761
2019-04-24 06:00:00	1.07	0.762324
2019-04-24 07:00:00	0.78	0.287152
2019-04-24 08:00:00	0.32	-0.171913
2019-04-24 09:00:00	-0.24	-0.559068
2019-04-24 10:00:00	-0.82	-0.932699
2019-04-24 11:00:00	-1.32	-1.24484
2019-04-24 12:00:00	-1.65	-1.47317
2019-04-24 13:00:00	-1.69	-1.24523
2019-04-24 14:00:00	-1.28	-0.315065
2019-04-24 15:00:00	-0.56	0.406547
2019-04-24 16:00:00	0.24	0.92869
2019-04-24 17:00:00	0.9	1.25308
2019-04-24 18:00:00	1.26	1.44889
2019-04-24 19:00:00	1.28	1.43844
2019-04-24 20:00:00	1.02	1.11014
2019-04-24 21:00:00	0.64	0.465202
2019-04-24 22:00:00	0.22	-0.0484573
2019-04-24 23:00:00	-0.22	-0.417988
2019-04-25	-0.58	-0.664183
2019-04-25 01:00:00	-0.7	-0.796741
2019-04-25 02:00:00	-0.49	-0.606425
2019-04-25 03:00:00	0	-0.0216893
2019-04-25 04:00:00	0.54	0.457096
2019-04-25 05:00:00	0.93	0.721111
2019-04-25 06:00:00	1.08	0.716471
2019-04-25 07:00:00	0.94	0.442884
2019-04-25 08:00:00	0.59	-0.0088449
2019-04-25 09:00:00	0.1	-0.390529
2019-04-25 10:00:00	-0.45	-0.735623
2019-04-25 11:00:00	-1	-1.05969
2019-04-25 12:00:00	-1.43	-1.32541
2019-04-25 13:00:00	-1.65	-1.42658
2019-04-25 14:00:00	-1.54	-0.935478
2019-04-25 15:00:00	-1.05	-0.069152
2019-04-25 16:00:00	-0.34	0.494452
2019-04-25 17:00:00	0.39	0.910638
2019-04-25 18:00:00	0.96	1.19345
2019-04-25 19:00:00	1.23	1.33308
2019-04-25 20:00:00	1.17	1.3169
2019-04-25 21:00:00	0.9	0.965161
2019-04-25 22:00:00	0.53	0.363745
2019-04-25 23:00:00	0.13	-0.0893122
2019-04-26	-0.26	-0.414006
2019-04-26 01:00:00	-0.52	-0.602028
2019-04-26 02:00:00	-0.52	-0.666014
2019-04-26 03:00:00	-0.25	-0.459569
2019-04-26 04:00:00	0.21	-0.0125114
2019-04-26 05:00:00	0.66	0.361592
2019-04-26 06:00:00	0.93	0.545744
2019-04-26 07:00:00	0.97	0.478886
2019-04-26 08:00:00	0.77	0.169691
2019-04-26 09:00:00	0.41	-0.220494
2019-04-26 10:00:00	-0.07	-0.54133
2019-04-26 11:00:00	-0.6	-0.838489
2019-04-26 12:00:00	-1.08	-1.1132
2019-04-26 13:00:00	-1.42	-1.31004
2019-04-26 14:00:00	-1.53	-1.26847
2019-04-26 15:00:00	-1.33	-0.681583
2019-04-26 16:00:00	-0.84	0.0371636
2019-04-26 17:00:00	-0.19	0.513761
2019-04-26 18:00:00	0.46	0.852011
2019-04-26 19:00:00	0.93	1.09826
2019-04-26 20:00:00	1.13	1.2246
2019-04-26 21:00:00	1.05	1.20334
2019-04-26 22:00:00	0.79	0.863473
2019-04-26 23:00:00	0.46	0.327635
2019-04-27	0.1	-0.0844585
2019-04-27 01:00:00	-0.23	-0.366186
2019-04-27 02:00:00	-0.4	-0.527256
2019-04-27 03:00:00	-0.34	-0.568282
2019-04-27 04:00:00	-0.08	-0.425714
2019-04-27 05:00:00	0.31	-0.117998
2019-04-27 06:00:00	0.64	0.186234
2019-04-27 07:00:00	0.82	0.348748
2019-04-27 08:00:00	0.81	0.287608
2019-04-27 09:00:00	0.61	0.0183025
2019-04-27 10:00:00	0.28	-0.311389
2019-04-27 11:00:00	-0.16	-0.589786
2019-04-27 12:00:00	-0.63	-0.844362
2019-04-27 13:00:00	-1.03	-1.06977
2019-04-27 14:00:00	-1.3	-1.20674
2019-04-27 15:00:00	-1.35	-1.0892
2019-04-27 16:00:00	-1.13	-0.540738
2019-04-27 17:00:00	-0.69	0.0567499
2019-04-27 18:00:00	-0.12	0.482651
2019-04-27 19:00:00	0.43	0.788297
2019-04-27 20:00:00	0.83	1.0126
2019-04-27 21:00:00	1.01	1.14228
2019-04-27 22:00:00	0.95	1.12914
2019-04-27 23:00:00	0.74	0.827272
2019-04-28	0.45	0.345661
2019-04-28 01:00:00	0.13	-0.0494802
2019-04-28 02:00:00	-0.14	-0.320605
2019-04-28 03:00:00	-0.28	-0.489166
2019-04-28 04:00:00	-0.23	-0.5574
2019-04-28 05:00:00	-0.03	-0.495607
2019-04-28 06:00:00	0.27	-0.274032
2019-04-28 07:00:00	0.52	0.00522998
2019-04-28 08:00:00	0.66	0.206603
2019-04-28 09:00:00	0.65	0.224908
2019-04-28 10:00:00	0.5	0.0447058
2019-04-28 11:00:00	0.23	-0.234012
2019-04-28 12:00:00	-0.14	-0.486794
2019-04-28 13:00:00	-0.54	-0.715548
2019-04-28 14:00:00	-0.89	-0.92308
2019-04-28 15:00:00	-1.12	-1.05201
2019-04-28 16:00:00	-1.16	-0.985176
2019-04-28 17:00:00	-0.99	-0.555456
2019-04-28 18:00:00	-0.63	-0.00694632
2019-04-28 19:00:00	-0.15	0.419606
2019-04-28 20:00:00	0.35	0.739258
2019-04-28 21:00:00	0.72	0.970987
2019-04-28 22:00:00	0.92	1.10868
2019-04-28 23:00:00	0.91	1.10995
2019-04-29	0.75	0.84943
2019-04-29 01:00:00	0.49	0.381031
2019-04-29 02:00:00	0.18	-0.0333824
2019-04-29 03:00:00	-0.08	-0.331463
2019-04-29 04:00:00	-0.23	-0.528155
2019-04-29 05:00:00	-0.25	-0.637271
2019-04-29 06:00:00	-0.12	-0.628777
2019-04-29 07:00:00	0.1	-0.427726
2019-04-29 08:00:00	0.33	-0.0965834
2019-04-29 09:00:00	0.51	0.197358
2019-04-29 10:00:00	0.56	0.323663
2019-04-29 11:00:00	0.49	0.250151
2019-04-29 12:00:00	0.29	0.0225613
2019-04-29 13:00:00	-0.02	-0.242527
2019-04-29 14:00:00	-0.37	-0.485473
2019-04-29 15:00:00	-0.71	-0.715922
2019-04-29 16:00:00	-0.95	-0.890364
2019-04-29 17:00:00	-1.04	-0.924925
2019-04-29 18:00:00	-0.94	-0.644604
2019-04-29 19:00:00	-0.65	-0.1012
2019-04-29 20:00:00	-0.21	0.369805
2019-04-29 21:00:00	0.27	0.731024
2019-04-29 22:00:00	0.67	0.97993
2019-04-29 23:00:00	0.91	1.1246
2019-04-30	0.95	1.11874
2019-04-30 01:00:00	0.8	0.862512
2019-04-30 02:00:00	0.53	0.365383
2019-04-30 03:00:00	0.21	-0.0903815
2019-04-30 04:00:00	-0.09	-0.420143
2019-04-30 05:00:00	-0.31	-0.641776
2019-04-30 06:00:00	-0.4	-0.784336
2019-04-30 07:00:00	-0.32	-0.784986
2019-04-30 08:00:00	-0.11	-0.513376
2019-04-30 09:00:00	0.17	-0.0524993
2019-04-30 10:00:00	0.43	0.334936
2019-04-30 11:00:00	0.58	0.5165
2019-04-30 12:00:00	0.6	0.502595
2019-04-30 13:00:00	0.45	0.312126
2019-04-30 14:00:00	0.16	0.0127846
2019-04-30 15:00:00	-0.2	-0.288572
2019-04-30 16:00:00	-0.56	-0.570515
2019-04-30 17:00:00	-0.85	-0.800693
2019-04-30 18:00:00	-1	-0.90235
2019-04-30 19:00:00	-0.95	-0.712246
2019-04-30 20:00:00	-0.69	-0.148591
2019-04-30 21:00:00	-0.24	0.382273
2019-04-30 22:00:00	0.28	0.768582
2019-04-30 23:00:00	0.73	1.0171
2019-05-01	0.99	1.14372
		1.08083
		0.760138
		0.227518
		-0.235484
		-0.567476
		-0.567476
